# Supplementary material for: Lipid nanoparticle formulations including stereochemically defined glycomacromolecules for delivery of saRNA
Source: Royal Society of Chemistry journal article supplement (doi:10.1039/d6sc03833f), 2026-06-15
Supplement: d6sc03833f1.pdf [file d6sc03833f1.pdf]

## *Electronic Supporting Information*

### **Lipid Nanoparticle Formulations including Stereochemically Defined Glycomacromolecules for Delivery of saRNA**

Jonas Becker, †, <sup>a</sup> Beatriz Dias-Barbieri, †, <sup>b</sup> Robin J. Shattock, <sup>b\*</sup> and C. Remzi Becer <sup>a\*</sup>

<sup>a</sup> Department of Chemistry, University of Warwick, Coventry, CV4 7AL, United Kingdom

<sup>b</sup> Department of Infectious Diseases, Imperial College London, London W21PG, United Kingdom

Corresponding authors: [Remzi.Becer@warwick.ac.uk](mailto:Remzi.Becer@warwick.ac.uk) and [r.shattock@imperial.ac.uk](mailto:r.shattock@imperial.ac.uk)

#### **Contents**

|                                                            |    |
|------------------------------------------------------------|----|
| Synthesis procedures .....                                 | 2  |
| CuAAC of triazole backbone with chol-TEG-azide .....       | 2  |
| Thiol-ene reaction with Ac <sub>4</sub> ManSH.....         | 9  |
| NMR Spectra.....                                           | 18 |
| ESI-MS of Chol-Glyco-IEGmers.....                          | 24 |
| SPR Binding Curves of Glyco-Chol-IEGmers .....             | 25 |
| Physicochemical Characterisation of LNP formulations ..... | 32 |

## Synthesis procedures

### CuAAC of triazole backbone with chol-TEG-azide

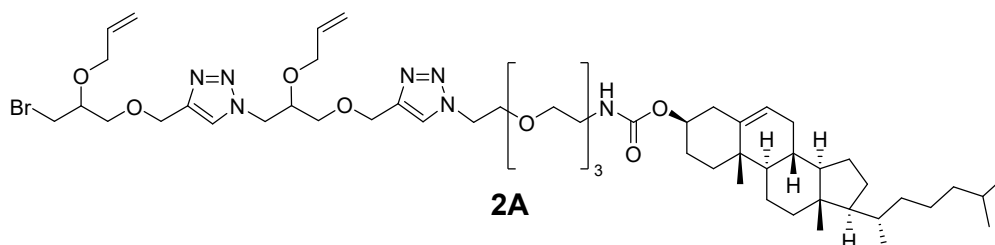

Under inert atmosphere, allyl-IEG-dimer **1** (0.021 g, 0.05 mmol, 1 eq) was dissolved in dry THF (0.25 mL) and the solution was degassed with an N<sub>2</sub> stream for 2 min. Tetrabutylammonium fluoride solution (1 M in THF, 0.053 mL, 1.1 eq) was added and the mixture was stirred for 2 h at r.t. In a separate vial, cholesteryl-TEG-azide (0.038 g, 0.06 mmol, 1.2 eq) was dissolved in dry THF (0.25 mL), degassed, and added to the reaction mixture. Copper(I) bromide (0.001 g, 0.008 mmol, 0.15 eq) and PMDETA (1.6 μL, 0.008 mmol, 0.15 eq) were added and the mixture was heated to 45 °C for 18 h. After completion, the solvent was removed under reduced pressure and dissolved in DCM (10 mL). The organic layer was washed with H<sub>2</sub>O (3x10 mL), dried over MgSO<sub>4</sub>, filtered and the solvent removed under reduced pressure. The product **2A** (0.044 g) was obtained as a viscous oil and used in the next step without further purification.

<sup>1</sup>H NMR (400 MHz, CDCl<sub>3</sub>): δ(ppm) 7.76 (s, 1H, Ar-*H*), 7.65 (s, 1H, Ar-*H*), 6.03-5.83 (m, 1H, CH=CH<sub>2</sub>), 5.80-5.62 (m, 1H, CH=CH<sub>2</sub>), 5.34 (bs, 2H, Chol-C=CH), 5.26-5.07 (m, 4H, CH=CH<sub>2</sub>), 4.71-4.61 (m, 4H, OCH<sub>2</sub>-Ar), 4.60-4.52 (m, 4H), 4.51-4.35 (m, 4H), 4.30-4.20 (m, 3H), 4.10 (s, 2H), 4.05-3.96 (m, 3H), 3.93-3.81 (m, 4H), 3.66 (s, 4H), 3.65-3.57 (m, 13H), 3.57-3.47 (m, 7H), 3.41-3.26 (m, 5H), 2.40-2.19 (m, 4H), 2.08-1.90 (m, 5H), 1.90-1.75 (m, 7H), 1.61-1.39 (m, 16H), 1.38-1.28 (m, 8H), 1.24 (s, 6H), 1.17-1.08 (m, 11H), 1.02-0.95 (m, 16H), 0.90 (d, J = 6.4 Hz, 8H), 0.85 (d, J = 6.5 Hz, 14H), 0.66 (6H).

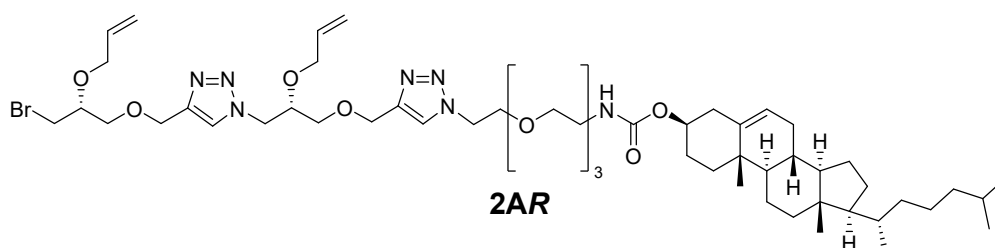

Under inert atmosphere, allyl-IEG-dimer **1R** (0.021 g, 0.05 mmol, 1 eq) was dissolved in dry THF (0.25 mL) and the solution was degassed with an N<sub>2</sub> stream for 2 min. Tetrabutylammonium fluoride solution (1 M in THF, 0.053 mL, 1.1 eq) was added and the mixture was stirred for 2 h at r.t. In a separate vial, cholesteryl-TEG-azide (0.038 g, 0.06 mmol, 1.2 eq) was dissolved in dry THF (0.25 mL), degassed, and added to the reaction mixture. Copper(I) bromide (0.001 g, 0.008 mmol, 0.15 eq) and PMDETA (1.6 μL, 0.008 mmol, 0.15 eq) were added and the mixture was heated to 45 °C for 18 h. After completion, the solvent was removed under reduced pressure and dissolved in DCM (10 mL). The organic layer was washed with H<sub>2</sub>O (3x10 mL), dried over MgSO<sub>4</sub>, filtered and the solvent removed under reduced pressure. The product **2AR** (0.042 g) was obtained as a viscous oil and used in the next step without further purification.

<sup>1</sup>H NMR (400 MHz, CDCl<sub>3</sub>): δ(ppm) 7.76 (s, 1H, Ar-*H*), 7.65 (s, 1H, Ar-*H*), 6.03-5.83 (m, 1H, CH=CH<sub>2</sub>), 5.80-5.62 (m, 1H, CH=CH<sub>2</sub>), 5.34 (bs, 2H, Chol-C=CH), 5.26-5.07 (m, 4H, CH=CH<sub>2</sub>), 4.71-4.61 (m, 4H, OCH<sub>2</sub>-Ar), 4.60-4.52 (m, 4H), 4.51-4.35 (m, 4H), 4.30-4.20 (m, 3H), 4.10 (s, 2H), 4.05-3.96 (m, 3H), 3.93-3.81 (m, 4H), 3.66 (s, 4H), 3.65-3.57 (m, 13H), 3.57-3.47 (m, 7H), 3.41-3.26 (m, 5H), 2.40-2.19 (m, 4H), 2.08-1.90 (m, 5H), 1.90-1.75 (m, 7H), 1.61-1.39 (m, 16H), 1.38-1.28 (m, 8H), 1.24 (s, 6H), 1.17-1.08 (m, 11H), 1.02-0.95 (m, 16H), 0.90 (d, J = 6.4 Hz, 8H), 0.85 (d, J = 6.5 Hz, 14H), 0.66 (6H).

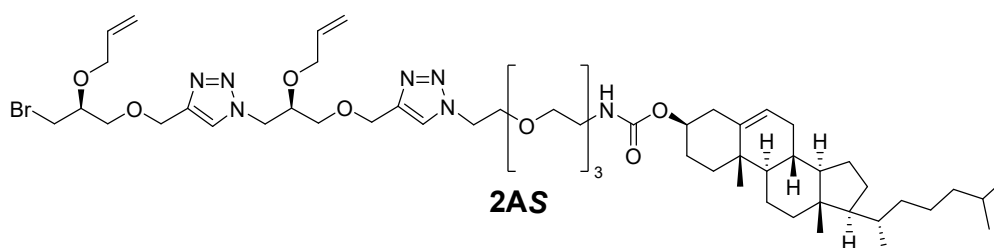

Under inert atmosphere, allyl-IEG-dimer **1S** (0.021 g, 0.05 mmol, 1 eq) was dissolved in dry THF (0.25 mL) and the solution was degassed with an N<sub>2</sub> stream for 2 min. Tetrabutylammonium fluoride solution (1 M in THF, 0.053 mL, 1.1 eq) was added and the mixture was stirred for 2 h at r.t. In a separate vial, cholesteryl-TEG-azide (0.038 g, 0.06 mmol, 1.2 eq) was dissolved in dry THF (0.25 mL), degassed, and added to the reaction mixture. Copper(I) bromide (0.001 g, 0.008 mmol, 0.15 eq) and PMDETA (1.6 μL, 0.008 mmol, 0.15 eq) were added and the mixture was heated to 45 °C for 18 h. After completion, the solvent was removed under reduced pressure and dissolved in DCM (10 mL). The organic layer was

washed with H<sub>2</sub>O (3x10 mL), dried over MgSO<sub>4</sub>, filtered and the solvent removed under reduced pressure. The product **2AS** (0.044 g) was obtained as a viscous oil and used in the next step without further purification.

<sup>1</sup>H NMR (400 MHz, CDCl<sub>3</sub>): δ(ppm) 7.76 (s, 1H, Ar-*H*), 7.65 (s, 1H, Ar-*H*), 6.03-5.83 (m, 1H, CH=CH<sub>2</sub>), 5.80-5.62 (m, 1H, CH=CH<sub>2</sub>), 5.34 (bs, 2H, Chol-C=CH), 5.26-5.07 (m, 4H, CH=CH<sub>2</sub>), 4.71-4.61 (m, 4H, OCH<sub>2</sub>-Ar), 4.60-4.52 (m, 4H), 4.51-4.35 (m, 4H), 4.30-4.20 (m, 3H), 4.10 (s, 2H), 4.05-3.96 (m, 3H), 3.93-3.81 (m, 4H), 3.66 (s, 4H), 3.65-3.57 (m, 13H), 3.57-3.47 (m, 7H), 3.41-3.26 (m, 5H), 2.40-2.19 (m, 4H), 2.08-1.90 (m, 5H), 1.90-1.75 (m, 7H), 1.61-1.39 (m, 16H), 1.38-1.28 (m, 8H), 1.24 (s, 6H), 1.17-1.08 (m, 11H), 1.02-0.95 (m, 16H), 0.90 (d, J = 6.4 Hz, 8H), 0.85 (d, J = 6.5 Hz, 14H), 0.66 (6H).

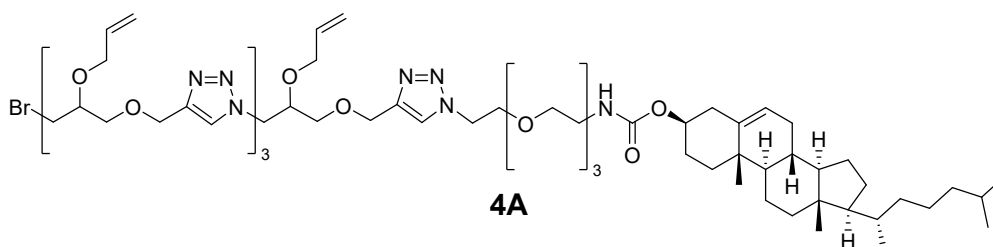

Under inert atmosphere, allyl-IEG-tetramer **1** (0.049 g, 0.05 mmol, 1 eq) was dissolved in dry THF (0.25 mL) and the solution was degassed with an N<sub>2</sub> stream for 2 min. Tetrabutylammonium fluoride solution (1 M in THF, 0.053 mL, 1.1 eq) was added and the mixture was stirred for 2 h at r.t. In a separate vial, cholesteryl-TEG-azide (0.038 g, 0.05 mmol, 1.2 eq) was dissolved in dry THF (0.25 mL), degassed, and added to the reaction mixture. Copper(I) bromide (0.001 g, 0.008 mmol, 0.15 eq) and PMDETA (1.6 μL, 0.008 mmol, 0.15 eq) were added and the mixture was heated to 45 °C for 18 h. After completion, the solvent was removed under reduced pressure and dissolved in DCM (10 mL). The organic layer was washed with H<sub>2</sub>O (3x10 mL), dried over MgSO<sub>4</sub>, filtered and the solvent removed under reduced pressure. The product **4A** (0.069 g) was obtained as a viscous oil and used in the next step without further purification.

<sup>1</sup>H NMR (400 MHz, CDCl<sub>3</sub>): δ(ppm) 7.77 (s, 1H, Ar-*H*), 7.70-7.62 (m, 3H, Ar-*H*), 6.03-5.83 (m, 1H, CH=CH<sub>2</sub>), 5.79-5.66 (m, 3H, CH=CH<sub>2</sub>), 5.38-5.32 (m, 2H, Chol-C=CH), 5.23-5.08 (m, 8H, CH=CH<sub>2</sub>), 4.71-4.63 (m, 8H, OCH<sub>2</sub>-Ar), 4.62-4.58 (m, 2H), 4.58-4.53 (m, 4H), 4.51-4.35 (m, 4H), 4.29-4.17 (m, 1H), 4.13-4.08 (m, 2H), 4.07-3.97 (m, 4H), 3.94-3.83 (m, 9H), 3.73-3.67 (m, 1H), 3.67-3.57 (m, 14H), 3.57-3.47 (m, 9H), 3.39-3.27 (m, 3H), 2.38-

2.19 (m, 4H), 2.06-1.90 (m, 5H), 1.90-1.70 (m, 11H), 1.61-1.40 (m, 11H), 1.39-1.30 (m, 5H), 1.25 (s, 4H), 1.17-1.06 (m, 10H), 1.03-0.96 (m, 12H), 0.90 (d, J = 6.5 Hz, 5H), 0.86 (dd, J = 6.6 Hz, 1.7 Hz, 10H), 0.67 (4H).

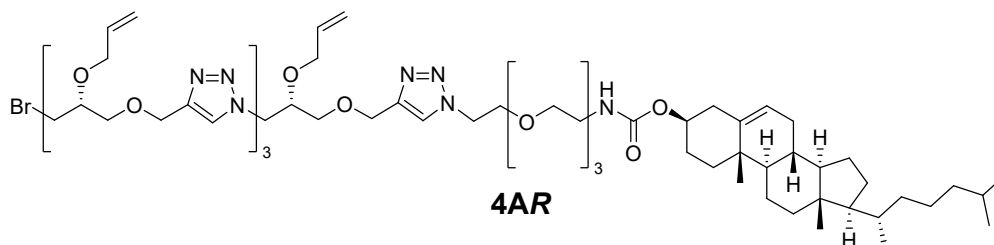

Under inert atmosphere, allyl-IEG-tetramer **1** (0.049 g, 0.05 mmol, 1 eq) was dissolved in dry THF (0.25 mL) and the solution was degassed with an N<sub>2</sub> stream for 2 min. Tetrabutylammonium fluoride solution (1 M in THF, 0.053 mL, 1.1 eq) was added and the mixture was stirred for 2 h at r.t. In a separate vial, cholesteryl-TEG-azide (0.038 g, 0.05 mmol, 1.2 eq) was dissolved in dry THF (0.25 mL), degassed, and added to the reaction mixture. Copper(I) bromide (0.001 g, 0.008 mmol, 0.15 eq) and PMDETA (1.6 μL, 0.008 mmol, 0.15 eq) were added and the mixture was heated to 45 °C for 18 h. After completion, the solvent was removed under reduced pressure and dissolved in DCM (10 mL). The organic layer was washed with H<sub>2</sub>O (3x10 mL), dried over MgSO<sub>4</sub>, filtered and the solvent removed under reduced pressure. The product **4AR** (0.074 g) was obtained as a viscous oil and used in the next step without further purification.

<sup>1</sup>H NMR (400 MHz, CDCl<sub>3</sub>): δ(ppm) 7.77 (s, 1H, Ar-H), 7.70-7.62 (m, 3H, Ar-H), 6.03-5.83 (m, 1H, CH=CH<sub>2</sub>), 5.79-5.66 (m, 3H, CH=CH<sub>2</sub>), 5.38-5.32 (m, 2H, Chol-C=CH), 5.23-5.08 (m, 8H, CH=CH<sub>2</sub>), 4.71-4.63 (m, 8H, OCH<sub>2</sub>-Ar), 4.62-4.58 (m, 2H), 4.58-4.53 (m, 4H), 4.51-4.35 (m, 4H), 4.29-4.17 (m, 1H), 4.13-4.08 (m, 2H), 4.07-3.97 (m, 4H), 3.94-3.83 (m, 9H), 3.73-3.67 (m, 1H), 3.67-3.57 (m, 14H), 3.57-3.47 (m, 9H), 3.39-3.27 (m, 3H), 2.38-2.19 (m, 4H), 2.06-1.90 (m, 5H), 1.90-1.70 (m, 11H), 1.61-1.40 (m, 11H), 1.39-1.30 (m, 5H), 1.25 (s, 4H), 1.17-1.06 (m, 10H), 1.03-0.96 (m, 12H), 0.90 (d, J = 6.5 Hz, 5H), 0.86 (dd, J = 6.6 Hz, 1.7 Hz, 10H), 0.67 (4H).

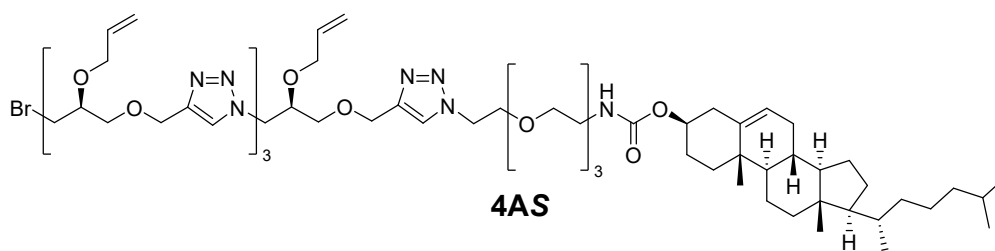

Under inert atmosphere, allyl-IEG-tetramer **1** (0.039 g, 0.04 mmol, 1 eq) was dissolved in dry THF (0.25 mL) and the solution was degassed with an N<sub>2</sub> stream for 2 min. Tetrabutylammonium fluoride solution (1 M in THF, 0.042 mL, 1.1 eq) was added and the mixture was stirred for 2 h at r.t. In a separate vial, cholesteryl-TEG-azide (0.028 g, 0.044 mmol, 1.1 eq) was dissolved in dry THF (0.25 mL), degassed, and added to the reaction mixture. Copper(I) bromide (0.001 g, 0.008 mmol 0.2 eq) and PMDETA (1.6 μL, 0.008 mmol, 0.2 eq) were added and the mixture was heated to 45 °C for 18 h. After completion, the solvent was removed under reduced pressure and dissolved in DCM (10 mL). The organic layer was washed with H<sub>2</sub>O (3x10 mL), dried over MgSO<sub>4</sub>, filtered and the solvent removed under reduced pressure. The product **4AS** (0.058 g) was obtained as a viscous oil and used in the next step without further purification.

<sup>1</sup>H NMR (400 MHz, CDCl<sub>3</sub>): δ(ppm) 7.77 (s, 1H, Ar-*H*), 7.70-7.62 (m, 3H, Ar-*H*), 6.03-5.83 (m, 1H, CH=CH<sub>2</sub>), 5.79-5.66 (m, 3H, CH=CH<sub>2</sub>), 5.38-5.32 (m, 2H, Chol-C=CH), 5.23-5.08 (m, 8H, CH=CH<sub>2</sub>), 4.71-4.63 (m, 8H, OCH<sub>2</sub>-Ar), 4.62-4.58 (m, 2H), 4.58-4.53 (m, 4H), 4.51-4.35 (m, 4H), 4.29-4.17 (m, 1H), 4.13-4.08 (m, 2H), 4.07-3.97 (m, 4H), 3.94-3.83 (m, 9H), 3.73-3.67 (m, 1H), 3.67-3.57 (m, 14H), 3.57-3.47 (m, 9H), 3.39-3.27 (m, 3H), 2.38-2.19 (m, 4H), 2.06-1.90 (m, 5H), 1.90-1.70 (m, 11H), 1.61-1.40 (m, 11H), 1.39-1.30 (m, 5H), 1.25 (s, 4H), 1.17-1.06 (m, 10H), 1.03-0.96 (m, 12H), 0.90 (d, J = 6.5 Hz, 5H), 0.86 (dd, J = 6.6 Hz, 1.7 Hz, 10H), 0.67 (4H).

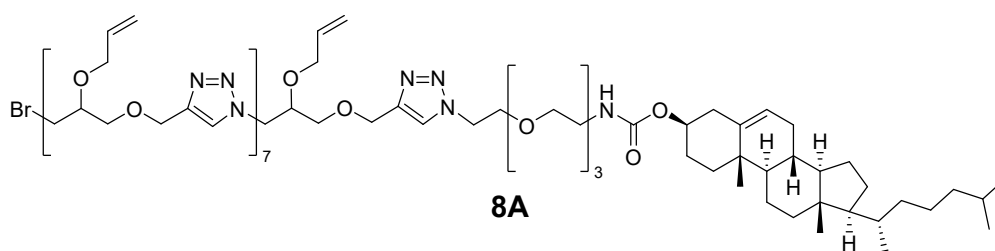

Under inert atmosphere, allyl-IEG-octamer **1** (0.058 g, 0.033 mmol, 1 eq) was dissolved in dry THF (0.25 mL) and the solution was degassed with an N<sub>2</sub> stream for 2 min.

Tetrabutylammonium fluoride solution (1 M in THF, 0.035 mL, 1.1 eq) was added and the mixture was stirred for 2 h at r.t. In a separate vial, cholesteryl-TEG-azide (0.023 g, 0.036 mmol, 1.1 eq) was dissolved in dry THF (0.25 mL), degassed, and added to the reaction mixture. Copper(I) bromide (0.001 g, 0.008 mmol, 0.25 eq) and PMDETA (1.6  $\mu$ L, 0.008 mmol, 0.25 eq) were added and the mixture was heated to 45 °C for 18 h. After completion, the solvent was removed under reduced pressure and dissolved in DCM (10 mL). The organic layer was washed with H<sub>2</sub>O (3x10 mL), dried over MgSO<sub>4</sub>, filtered and the solvent removed under reduced pressure. The product **8A** (0.074 g) was obtained as a viscous oil and used in the next step without further purification.

<sup>1</sup>H NMR (400 MHz, CDCl<sub>3</sub>):  $\delta$ (ppm) 7.75 (s, 1H, Ar-*H*), 7.66 (s, 6H, Ar-*H*), 7.63 (s, 1H, Ar-*H*), 5.93-5.81 (m, 1H, CH=CH<sub>2</sub>), 5.76-5.61 (m, 7H, CH=CH<sub>2</sub>), 5.37-5.29 (m, 2H, Chol-C=CH), 5.25-5.03 (m, 16H, CH=CH<sub>2</sub>), 4.69-4.60 (m, 15H, OCH<sub>2</sub>-Ar), 4.60-4.56 (m, 4H), 4.56-4.51 (m, 6H), 4.48-4.33 (m, 8H), 4.10-4.05 (m, 2H), 4.05-3.95 (m, 8H), 3.91-3.80 (m, 16H), 3.70-3.67 (m, 1H), 3.70-3.55 (m, 15H), 3.55-3.45 (m, 17H), 3.36-3.26 (m, 3H), 2.38-2.16 (m, 4H), 2.01-1.88 (m, 4H), 1.87-1.73 (m, 4H), 1.59-1.38 (m, 11H), 1.34-1.27 (m, 4H), 1.22 (s, 7H), 1.15-1.00 (m, 15H), 1.00-0.93 (m, 10H), 0.88 (d, *J* = 6.5 Hz, 5H), 0.83 (dd, *J* = 6.6 Hz, 1.7 Hz, 10H), 0.64 (4H).

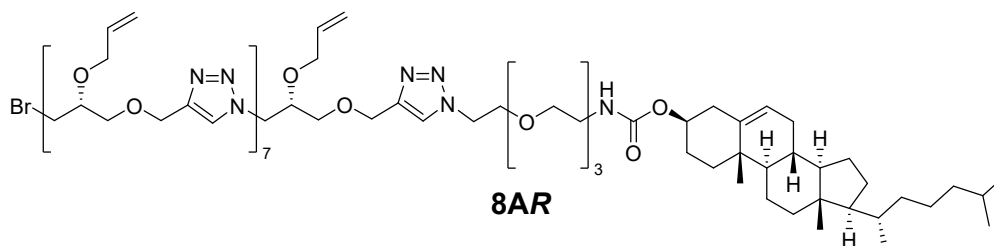

Under inert atmosphere, allyl-IEG-octamer **1** (0.049 g, 0.028 mmol, 1 eq) was dissolved in dry THF (0.25 mL) and the solution was degassed with an N<sub>2</sub> stream for 2 min. Tetrabutylammonium fluoride solution (1 M in THF, 0.029 mL, 1.1 eq) was added and the mixture was stirred for 2 h at r.t. In a separate vial, cholesteryl-TEG-azide (0.019 g, 0.031 mmol, 1.1 eq) was dissolved in dry THF (0.25 mL), degassed, and added to the reaction mixture. Copper(I) bromide (0.001 g, 0.008 mmol, 0.29 eq) and PMDETA (1.6  $\mu$ L, 0.008 mmol, 0.29 eq) were added and the mixture was heated to 45 °C for 18 h. After completion, the solvent was removed under reduced pressure and dissolved in DCM (10 mL). The organic layer was washed with H<sub>2</sub>O (3x10 mL), dried over MgSO<sub>4</sub>, filtered and the solvent

removed under reduced pressure. The product **8AR** (0.052 g) was obtained as a viscous oil and used in the next step without further purification.

$^1\text{H}$  NMR (400 MHz,  $\text{CDCl}_3$ ):  $\delta$ (ppm) 7.75 (s, 1H, Ar-*H*), 7.66 (s, 6H, Ar-*H*), 7.63 (s, 1H, Ar-*H*), 5.93-5.81 (m, 1H,  $\text{CH}=\text{CH}_2$ ), 5.76-5.61 (m, 7H,  $\text{CH}=\text{CH}_2$ ), 5.37-5.29 (m, 2H, Chol- $\text{C}=\text{CH}$ ), 5.25-5.03 (m, 16H,  $\text{CH}=\text{CH}_2$ ), 4.69-4.60 (m, 15H,  $\text{OCH}_2\text{-Ar}$ ), 4.60-4.56 (m, 4H), 4.56-4.51 (m, 6H), 4.48-4.33 (m, 8H), 4.10-4.05 (m, 2H), 4.05-3.95 (m, 8H), 3.91-3.80 (m, 16H), 3.70-3.67 (m, 1H), 3.70-3.55 (m, 15H), 3.55-3.45 (m, 17H), 3.36-3.26 (m, 3H), 2.38-2.16 (m, 4H), 2.01-1.88 (m, 4H), 1.87-1.73 (m, 4H), 1.59-1.38 (m, 11H), 1.34-1.27 (m, 4H), 1.22 (s, 7H), 1.15-1.00 (m, 15H), 1.00-0.93 (m, 10H), 0.88 (d,  $J = 6.5$  Hz, 5H), 0.83 (dd,  $J = 6.6$  Hz, 1.7 Hz, 10H), 0.64 (4H).

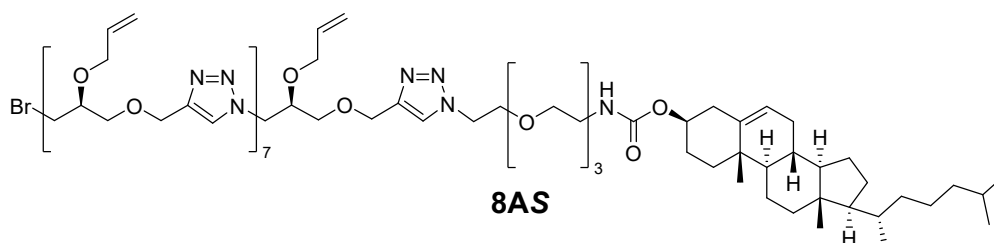

Under inert atmosphere, allyl-IEG-octamer **1** (0.053 g, 0.03 mmol, 1 eq) was dissolved in dry THF (0.25 mL) and the solution was degassed with an  $\text{N}_2$  stream for 2 min. Tetrabutylammonium fluoride solution (1 M in THF, 0.032 mL, 1.1 eq) was added and the mixture was stirred for 2 h at r.t. In a separate vial, cholesteryl-TEG-azide (0.021 g, 0.033 mmol, 1.1 eq) was dissolved in dry THF (0.25 mL), degassed, and added to the reaction mixture. Copper(I) bromide (0.001 g, 0.008 mmol, 0.27 eq) and PMDETA (1.6  $\mu\text{L}$ , 0.008 mmol, 0.27 eq) were added and the mixture was heated to 45  $^\circ\text{C}$  for 18 h. After completion, the solvent was removed under reduced pressure and dissolved in DCM (10 mL). The organic layer was washed with  $\text{H}_2\text{O}$  (3x10 mL), dried over  $\text{MgSO}_4$ , filtered and the solvent removed under reduced pressure. The product **8AS** (0.048 g) was obtained as a viscous oil and used in the next step without further purification.

$^1\text{H}$  NMR (400 MHz,  $\text{CDCl}_3$ ):  $\delta$ (ppm) 7.75 (s, 1H, Ar-*H*), 7.66 (s, 6H, Ar-*H*), 7.63 (s, 1H, Ar-*H*), 5.93-5.81 (m, 1H,  $\text{CH}=\text{CH}_2$ ), 5.76-5.61 (m, 7H,  $\text{CH}=\text{CH}_2$ ), 5.37-5.29 (m, 2H, Chol- $\text{C}=\text{CH}$ ), 5.25-5.03 (m, 16H,  $\text{CH}=\text{CH}_2$ ), 4.69-4.60 (m, 15H,  $\text{OCH}_2\text{-Ar}$ ), 4.60-4.56 (m, 4H), 4.56-4.51 (m, 6H), 4.48-4.33 (m, 8H), 4.10-4.05 (m, 2H), 4.05-3.95 (m, 8H), 3.91-3.80 (m, 16H), 3.70-3.67 (m, 1H), 3.70-3.55 (m, 15H), 3.55-3.45 (m, 17H), 3.36-3.26 (m, 3H), 2.38-

2.16 (m, 4H), 2.01-1.88 (m, 4H), 1.87-1.73 (m, 4H), 1.59-1.38 (m, 11H), 1.34-1.27 (m, 4H), 1.22 (s, 7H), 1.15-1.00 (m, 15H), 1.00-0.93 (m, 10H), 0.88 (d,  $J = 6.5$  Hz, 5H), 0.83 (dd,  $J = 6.6$  Hz, 1.7 Hz, 10H), 0.64 (4H).

### Thiol-ene reaction with Ac<sub>4</sub>ManSH

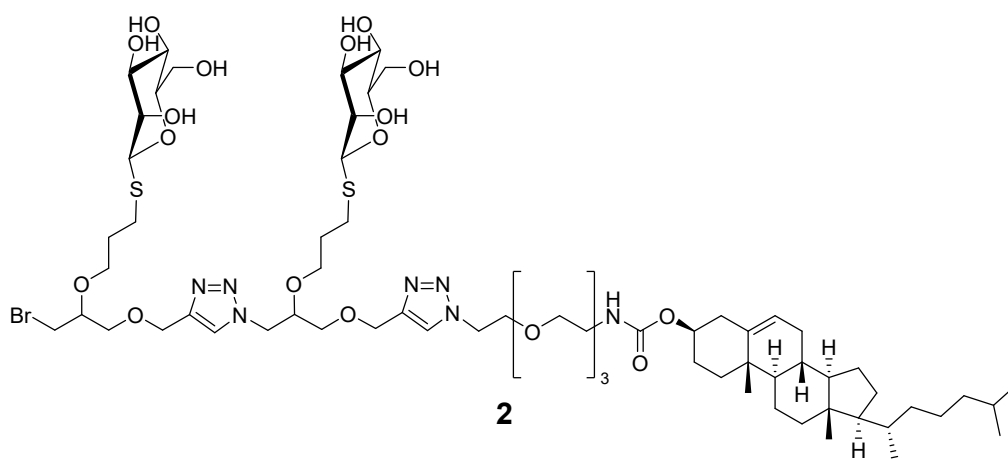

Under inert atmosphere, **2A** (0.016 g, 0.015 mmol, 1 eq) was dissolved in dry acetonitrile (0.4 mL) and Ac<sub>4</sub>ManSH (0.066 g, 0.180 mmol, 12 eq) and AIBN (0.001 g, 0.008 mmol, 0.5 eq) were added. The suspension was degassed with a stream of nitrogen for 5 min and was heated to 70 °C for 18 h. Afterwards the solvent was removed under reduced pressure and the residue was dissolved in methanol (0.5 mL). Sodium methoxide solution (25w% in MeOH, 20  $\mu$ L) was added and the mixture was stirred at r.t. for 2 h. A mixture of H<sub>2</sub>O/DMSO 1:1 (5 mL) was added, and the solution was transferred into a dialysis bag (MWCO: 100-500 Da) and dialysed against H<sub>2</sub>O for 48 h. Lyophilisation afforded the product **2** (0.010 g, 46%) as a white solid.

<sup>1</sup>H NMR (400 MHz, DMSO-*d*<sub>6</sub>):  $\delta$ (ppm) 8.09 (s, 1H, Ar-*H*), 8.05 (s, 1H, Ar-*H*), 7.06 (t,  $J = 5.7$  Hz, 1H, NH), 5.32 (bs, 1H, Chol-C=CH), 4.80-4.70 (m, 4H, Man-CH), 4.69-4.63 (m, 2H, Man-CH), 4.60 (s, 1H), 4.56 (s, 3H, OCH<sub>2</sub>-Ar), 4.54-4.47 (m, 6H, OCH<sub>2</sub>), 4.46-4.41 (m, 2H), 4.41-4.33 (m, 2H), 4.33-4.24 (m, 2H), 3.85-3.78 (m, 3H), 3.70-3.60 (m, 5H), 3.54-3.44 (m, 14H, TEG-CH<sub>2</sub>), 3.29 (bs, 4H), 3.13-3.00 (m, 5H), 2.69-2.61 (m, 2H), 2.54 (s, 5H), 2.35-2.13 (m, 4H), 1.99-1.86 (m, 3H), 1.86-1.70 (m, 5H), 1.68-1.58 (m, 3H), 1.57-1.42 (m, 8H), 1.42-1.28 (m, 7H), 1.23 (s, 5H), 1.15-0.98 (m, 10H), 0.95 (s, 5H), 0.89 (d,  $J = 6.4$  Hz, 4H), 0.84 (d,  $J = 6.6$  Hz, 8H), 0.64 (s, 3H).

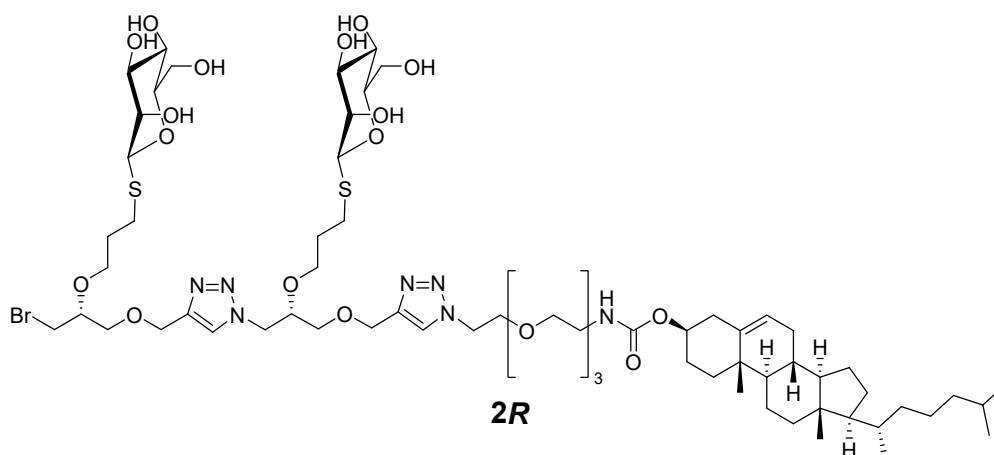

Under inert atmosphere, **2AR** (0.042 g, 0.041 mmol, 1 eq) was dissolved in dry acetonitrile (0.4 mL) and Ac<sub>4</sub>ManSH (0.179 g, 0.492 mmol, 12 eq) and AIBN (0.003 g, 0.021 mmol, 0.5 eq) were added. The suspension was degassed with a stream of nitrogen for 5 min and was heated to 70 °C for 18 h. Afterwards the solvent was removed under reduced pressure and the residue was dissolved in methanol (0.5 mL). Sodium methoxide solution (25w% in MeOH, 30 μL) was added and the mixture was stirred at r.t. for 2 h. A mixture of H<sub>2</sub>O/DMSO 1:1 (5 mL) was added, and the solution was transferred into a dialysis bag (MWCO: 100-500 Da) and dialysed against H<sub>2</sub>O for 48 h. Lyophilisation afforded the product **2R** (0.018 g, 30%) as a white solid.

<sup>1</sup>H NMR (400 MHz, DMSO-*d*<sub>6</sub>): δ(ppm) 8.09 (s, 1H, Ar-*H*), 8.05 (s, 1H, Ar-*H*), 7.06 (t, *J* = 5.7 Hz, 1H, *NH*), 5.32 (bs, 1H, Chol-C=CH), 4.80-4.70 (m, 4H, Man-CH), 4.69-4.63 (m, 2H, Man-CH), 4.60 (s, 1H), 4.56 (s, 3H, OCH<sub>2</sub>-Ar), 4.54-4.47 (m, 6H, OCH<sub>2</sub>), 4.46-4.41 (m, 2H), 4.41-4.33 (m, 2H), 4.33-4.24 (m, 2H), 3.85-3.78 (m, 3H), 3.70-3.60 (m, 5H), 3.54-3.44 (m, 14H, TEG-CH<sub>2</sub>), 3.29 (bs, 4H), 3.13-3.00 (m, 5H), 2.69-2.61 (m, 2H), 2.54 (s, 5H), 2.35-2.13 (m, 4H), 1.99-1.86 (m, 3H), 1.86-1.70 (m, 5H), 1.68-1.58 (m, 3H), 1.57-1.42 (m, 8H), 1.42-1.28 (m, 7H), 1.23 (s, 5H), 1.15-0.98 (m, 10H), 0.95 (s, 5H), 0.89 (d, *J* = 6.4 Hz, 4H), 0.84 (d, *J* = 6.6 Hz, 8H), 0.64 (s, 3H).

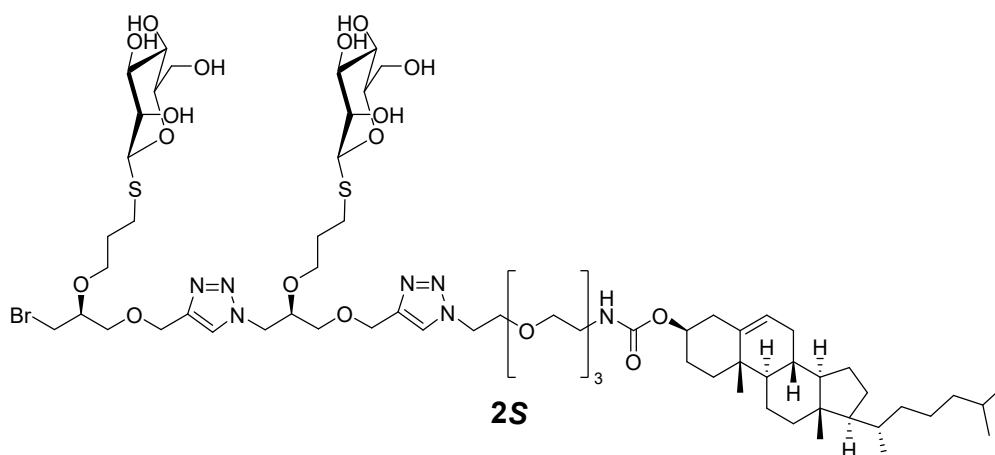

Under inert atmosphere, **2AS** (0.044 g, 0.042 mmol, 1 eq) was dissolved in dry acetonitrile (0.4 mL) and Ac<sub>4</sub>ManSH (0.184 g, 0.504 mmol, 12 eq) and AIBN (0.003 g, 0.021 mmol, 0.5 eq) were added. The suspension was degassed with a stream of nitrogen for 5 min and was heated to 70 °C for 18 h. Afterwards the solvent was removed under reduced pressure and the residue was dissolved in methanol (0.5 mL). Sodium methoxide solution (25w% in MeOH, 30 μL) was added and the mixture was stirred at r.t. for 2 h. A mixture of H<sub>2</sub>O/DMSO 1:1 (5 mL) was added, and the solution was transferred into a dialysis bag (MWCO: 100-500 Da) and dialysed against H<sub>2</sub>O for 48 h. Lyophilisation afforded the product **2S** (0.021 g, 34%) as a white solid.

<sup>1</sup>H NMR (400 MHz, DMSO-*d*<sub>6</sub>): δ(ppm) 8.09 (s, 1H, Ar-*H*), 8.05 (s, 1H, Ar-*H*), 7.06 (t, *J* = 5.7 Hz, 1H, *NH*), 5.32 (bs, 1H, Chol-C=CH), 4.80-4.70 (m, 4H, Man-CH), 4.69-4.63 (m, 2H, Man-CH), 4.60 (s, 1H), 4.56 (s, 3H, OCH<sub>2</sub>-Ar), 4.54-4.47 (m, 6H, OCH<sub>2</sub>), 4.46-4.41 (m, 2H), 4.41-4.33 (m, 2H), 4.33-4.24 (m, 2H), 3.85-3.78 (m, 3H), 3.70-3.60 (m, 5H), 3.54-3.44 (m, 14H, TEG-CH<sub>2</sub>), 3.29 (bs, 4H), 3.13-3.00 (m, 5H), 2.69-2.61 (m, 2H), 2.54 (s, 5H), 2.35-2.13 (m, 4H), 1.99-1.86 (m, 3H), 1.86-1.70 (m, 5H), 1.68-1.58 (m, 3H), 1.57-1.42 (m, 8H), 1.42-1.28 (m, 7H), 1.23 (s, 5H), 1.15-0.98 (m, 10H), 0.95 (s, 5H), 0.89 (d, *J* = 6.4 Hz, 4H), 0.84 (d, *J* = 6.6 Hz, 8H), 0.64 (s, 3H).

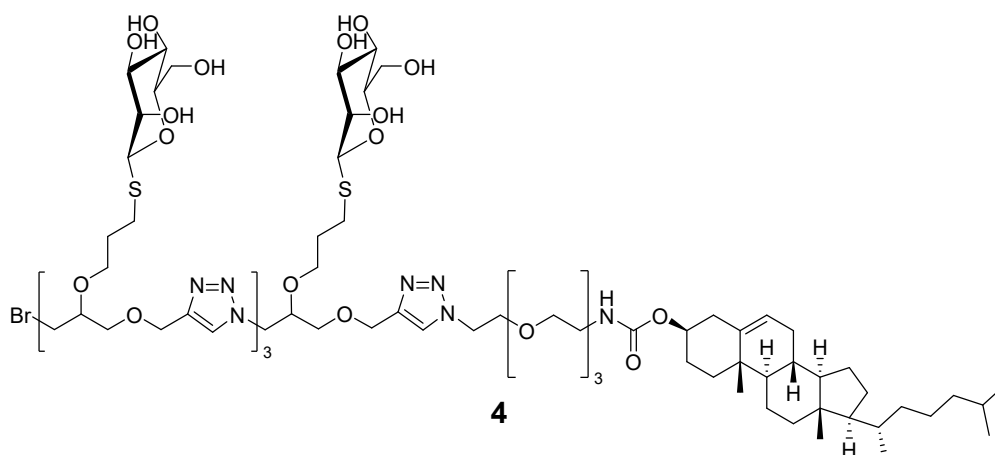

Under inert atmosphere, **4A** (0.029 g, 0.020 mmol, 1 eq) was dissolved in dry acetonitrile (0.4 mL) and Ac<sub>4</sub>ManSH (0.262 g, 0.720 mmol, 36 eq) and AIBN (0.003 g, 0.02 mmol, 1 eq) were added. The suspension was degassed with a stream of nitrogen for 5 min and was heated to 70 °C for 18 h. Afterwards the solvent was removed under reduced pressure and the residue was dissolved in methanol (0.5 mL). Sodium methoxide solution (25w% in MeOH, 30 μL) was added and the mixture was stirred at r.t. for 2 h. A mixture of H<sub>2</sub>O/DMSO 1:1 (5 mL) was added, and the solution was transferred into a dialysis bag (MWCO: 1 kDa) and dialysed against H<sub>2</sub>O for 48 h. Lyophilisation afforded the product **4** (0.039 g, 87%) as a white solid.

<sup>1</sup>H NMR (400 MHz, DMSO-*d*<sub>6</sub>): δ(ppm) 8.09 (s, 1H, Ar-*H*), 8.05 (s, 3H, Ar-*H*), 7.06 (t, *J* = 5.7 Hz, 1H, NH), 5.32 (bs, 1H, Chol-C=CH), 4.99-4.82 (m, 3H, Man-CH), 4.56 (bs, 9H, OCH<sub>2</sub>-Ar), 4.52 (bs, 10H, OCH<sub>2</sub> + Man-CH), 4.44-4.34 (m, 4H, OCH<sub>2</sub>), 4.33-4.24 (m, 2H), 3.88-3.78 (m, 7H), 3.72-3.60 (m, 13H), 3.30 (bs, 14H), 3.13-3.00 (m, 8H), 2.71-2.58 (m, 2H), 2.54 (s, 5H), 2.34-2.13 (m, 3H), 1.99-1.86 (m, 3H), 1.86-1.70 (m, 5H), 1.68-1.58 (m, 3H), 1.56-1.42 (m, 7H), 1.42-1.28 (m, 6H), 1.25-1.18 (m, 3H), 1.15-0.97 (m, 11H), 0.95 (s, 4H), 0.89 (d, *J* = 6.3 Hz, 4H), 0.86-0.81 (m, 7H), 0.64 (s, 3H).

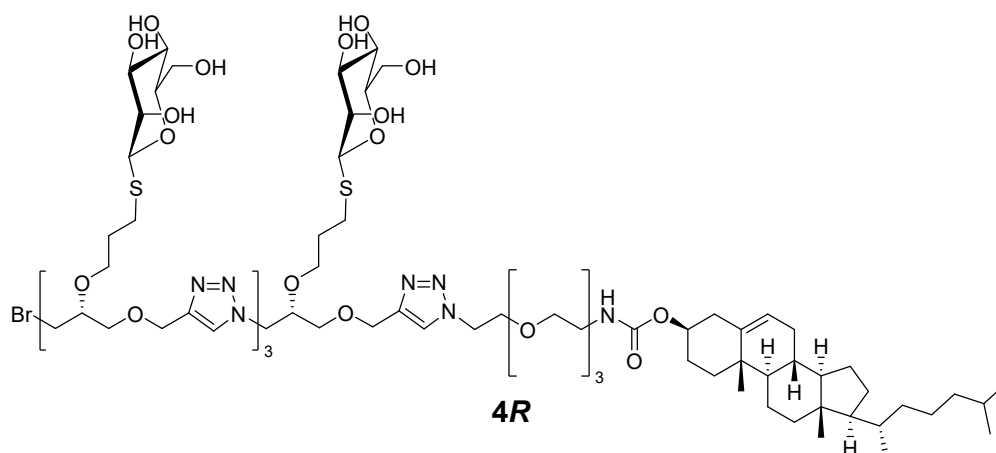

Under inert atmosphere, **4AR** (0.029 g, 0.020 mmol, 1 eq) was dissolved in dry acetonitrile (0.4 mL) and Ac<sub>4</sub>ManSH (0.262 g, 0.720 mmol, 36 eq) and AIBN (0.003 g, 0.02 mmol, 1 eq) were added. The suspension was degassed with a stream of nitrogen for 5 min and was heated to 70 °C for 18 h. Afterwards the solvent was removed under reduced pressure and the residue was dissolved in methanol (0.5 mL). Sodium methoxide solution (25w% in MeOH, 30 μL) was added and the mixture was stirred at r.t. for 2 h. A mixture of H<sub>2</sub>O/DMSO 1:1 (5 mL) was added, and the solution was transferred into a dialysis bag (MWCO: 1 kDa) and dialysed against H<sub>2</sub>O for 48 h. Lyophilisation afforded the product **4R** (0.032 g, 72%) as a white solid.

<sup>1</sup>H NMR (400 MHz, DMSO-*d*<sub>6</sub>): δ(ppm) 8.09 (s, 1H, Ar-*H*), 8.05 (s, 3H, Ar-*H*), 7.06 (t, *J* = 5.7 Hz, 1H, *NH*), 5.32 (bs, 1H, Chol-C=CH), 4.99-4.82 (m, 3H, Man-*CH*), 4.56 (bs, 9H, OCH<sub>2</sub>-Ar), 4.52 (bs, 10H, OCH<sub>2</sub> + Man-*CH*), 4.44-4.34 (m, 4H, OCH<sub>2</sub>), 4.33-4.24 (m, 2H), 3.88-3.78 (m, 7H), 3.72-3.60 (m, 13H), 3.30 (bs, 14H), 3.13-3.00 (m, 8H), 2.71-2.58 (m, 2H), 2.54 (s, 5H), 2.34-2.13 (m, 3H), 1.99-1.86 (m, 3H), 1.86-1.70 (m, 5H), 1.68-1.58 (m, 3H), 1.56-1.42 (m, 7H), 1.42-1.28 (m, 6H), 1.25-1.18 (m, 3H), 1.15-0.97 (m, 11H), 0.95 (s, 4H), 0.89 (d, *J* = 6.3 Hz, 4H), 0.86-0.81 (m, 7H), 0.64 (s, 3H).

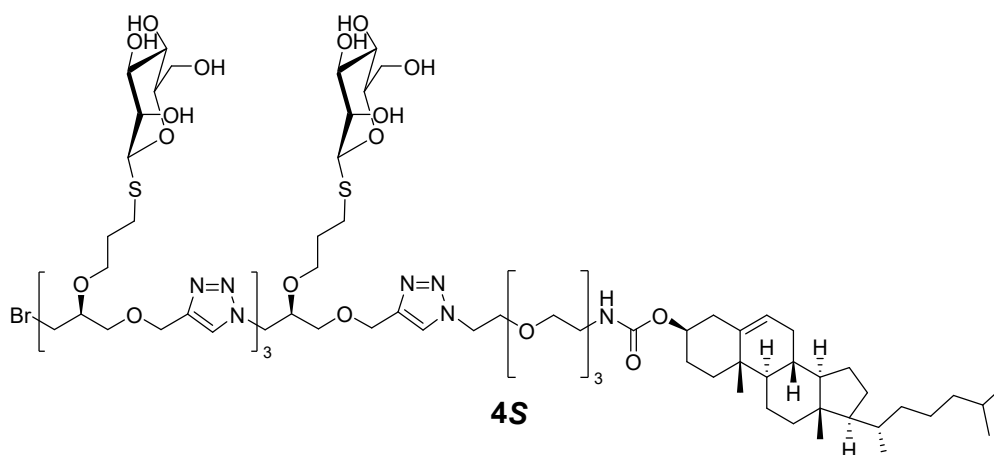

Under inert atmosphere, **4AS** (0.029 g, 0.020 mmol, 1 eq) was dissolved in dry acetonitrile (0.4 mL) and Ac<sub>4</sub>ManSH (0.262 g, 0.720 mmol, 36 eq) and AIBN (0.003 g, 0.02 mmol, 1 eq) were added. The suspension was degassed with a stream of nitrogen for 5 min and was heated to 70 °C for 18 h. Afterwards the solvent was removed under reduced pressure and the residue was dissolved in methanol (0.5 mL). Sodium methoxide solution (25w% in MeOH, 30 μL) was added and the mixture was stirred at r.t. for 2 h. A mixture of H<sub>2</sub>O/DMSO 1:1 (5 mL) was added, and the solution was transferred into a dialysis bag (MWCO: 1 kDa) and dialysed against H<sub>2</sub>O for 48 h. Lyophilisation afforded the product **4S** (0.027 g, 60%) as a white solid.

<sup>1</sup>H NMR (400 MHz, DMSO-*d*<sub>6</sub>): δ(ppm) 8.09 (s, 1H, Ar-*H*), 8.05 (s, 3H, Ar-*H*), 7.06 (t, *J* = 5.7 Hz, 1H, NH), 5.32 (bs, 1H, Chol-C=CH), 4.99-4.82 (m, 3H, Man-CH), 4.56 (bs, 9H, OCH<sub>2</sub>-Ar), 4.52 (bs, 10H, OCH<sub>2</sub> + Man-CH), 4.44-4.34 (m, 4H, OCH<sub>2</sub>), 4.33-4.24 (m, 2H), 3.88-3.78 (m, 7H), 3.72-3.60 (m, 13H), 3.30 (bs, 14H), 3.13-3.00 (m, 8H), 2.71-2.58 (m, 2H), 2.54 (s, 5H), 2.34-2.13 (m, 3H), 1.99-1.86 (m, 3H), 1.86-1.70 (m, 5H), 1.68-1.58 (m, 3H), 1.56-1.42 (m, 7H), 1.42-1.28 (m, 6H), 1.25-1.18 (m, 3H), 1.15-0.97 (m, 11H), 0.95 (s, 4H), 0.89 (d, *J* = 6.3 Hz, 4H), 0.84 (dd, *J* = 6.5, 1.4 Hz, 7H), 0.64 (s, 3H).

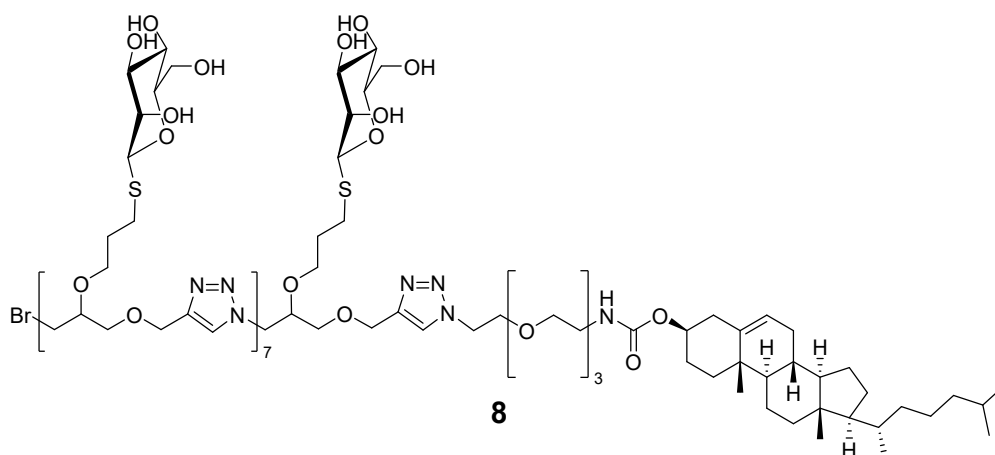

Under inert atmosphere, **8A** (0.033 g, 0.015 mmol, 1 eq) was dissolved in dry acetonitrile (1 mL) and Ac<sub>4</sub>ManSH (0.525 g, 1.440 mmol, 96 eq) and AIBN (0.005 g, 0.03 mmol, 2 eq) were added. The suspension was degassed with a stream of nitrogen for 5 min and was heated to 70 °C for 18 h. Afterwards the solvent was removed under reduced pressure and the residue was dissolved in methanol (0.5 mL). Sodium methoxide solution (25w% in MeOH, 40 μL) was added and the mixture was stirred at r.t. for 2 h. A mixture of H<sub>2</sub>O/DMSO 1:1 (5 mL) was added, and the solution was transferred into a dialysis bag (MWCO: 1 kDa) and dialysed against H<sub>2</sub>O for 48 h. Lyophilisation afforded the product **8** (0.032 g, 56%) as a white solid.

<sup>1</sup>H NMR (400 MHz, DMSO-*d*<sub>6</sub>): δ(ppm) 8.08 (s, 1H, Ar-*H*), 8.05 (s, 7H, Ar-*H*), 7.01 (t, *J* = 5.3 Hz, 1H, NH), 5.32 (bs, 1H, Chol-C=CH), 5.20-4.76 (m, 19H), 4.68 (bs, 9H), 4.57 (bs, 18H), 4.53 (bs, 13H), 4.51-4.43 (m, 11H), 4.42-4.33 (m, 9H), 4.31-4.21 (m, 3H), 3.88-3.78 (m, 12H), 3.72-3.58 (m, 25H), 3.56-3.47 (m, 36H), 3.31 (bs, 22H), 3.13-3.00 (m, 9H), 2.72-2.58 (m, 2H), 2.48-2.38 (m, 7H), 1.99-1.86 (m, 3H), 1.85-1.71 (m, 5H), 1.62 (bs, 17H), 1.55-1.44 (m, 5H), 1.42-1.14 (m, 18H), 1.14-0.97 (m, 13H), 0.95 (s, 4H), 0.89 (d, *J* = 6.3 Hz, 4H), 0.83 (dd, *J* = 6.6, 1.6 Hz, 7H), 0.64 (s, 3H).

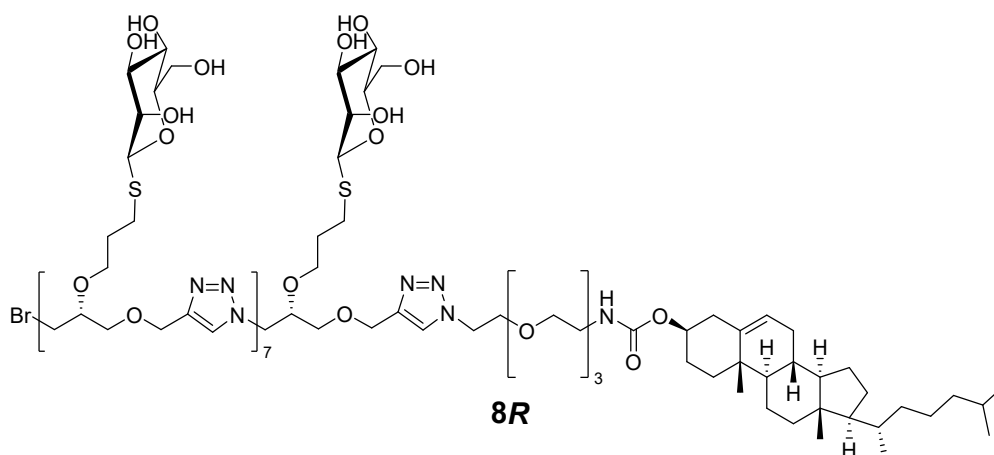

Under inert atmosphere, **8AR** (0.033 g, 0.015 mmol, 1 eq) was dissolved in dry acetonitrile (1 mL) and Ac<sub>4</sub>ManSH (0.525 g, 1.440 mmol, 96 eq) and AIBN (0.005 g, 0.03 mmol, 2 eq) were added. The suspension was degassed with a stream of nitrogen for 5 min and was heated to 70 °C for 18 h. Afterwards the solvent was removed under reduced pressure and the residue was dissolved in methanol (0.5 mL). Sodium methoxide solution (25w% in MeOH, 40 μL) was added and the mixture was stirred at r.t. for 2 h. A mixture of H<sub>2</sub>O/DMSO 1:1 (5 mL) was added, and the solution was transferred into a dialysis bag (MWCO: 1 kDa) and dialysed against H<sub>2</sub>O for 48 h. Lyophilisation afforded the product **8R** (0.020 g, 35%) as a white solid.

<sup>1</sup>H NMR (400 MHz, DMSO-*d*<sub>6</sub>): δ(ppm) 8.08 (s, 1H, Ar-*H*), 8.05 (s, 7H, Ar-*H*), 7.01 (t, *J* = 5.3 Hz, 1H, NH), 5.32 (bs, 1H, Chol-C=CH), 5.20-4.76 (m, 19H), 4.68 (bs, 9H), 4.57 (bs, 18H), 4.53 (bs, 13H), 4.51-4.43 (m, 11H), 4.42-4.33 (m, 9H), 4.31-4.21 (m, 3H), 3.88-3.78 (m, 12H), 3.72-3.58 (m, 25H), 3.56-3.47 (m, 36H), 3.31 (bs, 22H), 3.13-3.00 (m, 9H), 2.72-2.58 (m, 2H), 2.48-2.38 (m, 7H), 1.99-1.86 (m, 3H), 1.85-1.71 (m, 5H), 1.62 (bs, 17H), 1.55-1.44 (m, 5H), 1.42-1.14 (m, 18H), 1.14-0.97 (m, 13H), 0.95 (s, 4H), 0.89 (d, *J* = 6.3 Hz, 4H), 0.83 (dd, *J* = 6.6, 1.6 Hz, 7H), 0.64 (s, 3H).

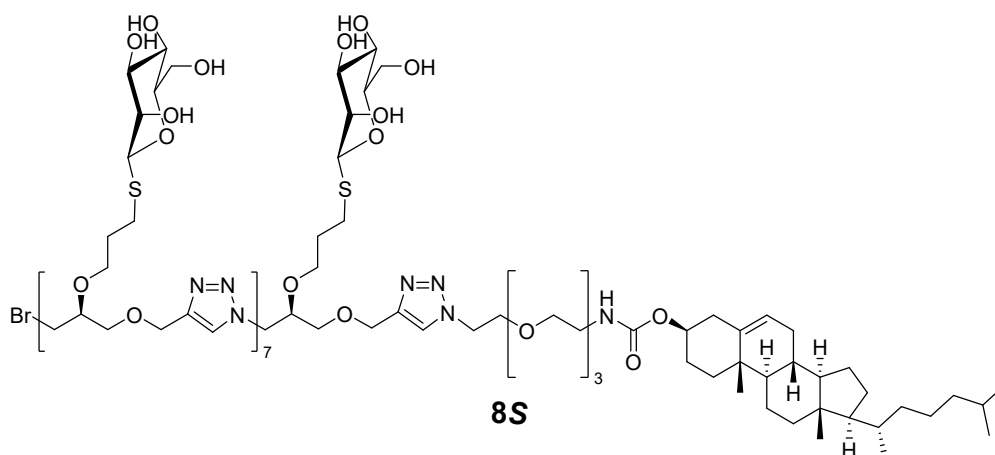

Under inert atmosphere, **8AS** (0.033 g, 0.015 mmol, 1 eq) was dissolved in dry acetonitrile (1 mL) and Ac<sub>4</sub>ManSH (0.525 g, 1.440 mmol, 96 eq) and AIBN (0.005 g, 0.03 mmol, 2 eq) were added. The suspension was degassed with a stream of nitrogen for 5 min and was heated to 70 °C for 18 h. Afterwards the solvent was removed under reduced pressure and the residue was dissolved in methanol (0.5 mL). Sodium methoxide solution (25w% in MeOH, 40 μL) was added and the mixture was stirred at r.t. for 2 h. A mixture of H<sub>2</sub>O/DMSO 1:1 (5 mL) was added, and the solution was transferred into a dialysis bag (MWCO: 1 kDa) and dialysed against H<sub>2</sub>O for 48 h. Lyophilisation afforded the product **8S** (0.025 g, 44%) as a white solid.

<sup>1</sup>H NMR (400 MHz, DMSO-*d*<sub>6</sub>): δ(ppm) 8.08 (s, 1H, Ar-*H*), 8.05 (s, 7H, Ar-*H*), 7.01 (t, *J* = 5.3 Hz, 1H, NH), 5.32 (bs, 1H, Chol-C=CH), 5.20-4.76 (m, 19H), 4.68 (bs, 9H), 4.57 (bs, 18H), 4.53 (bs, 13H), 4.51-4.43 (m, 11H), 4.42-4.33 (m, 9H), 4.31-4.21 (m, 3H), 3.88-3.78 (m, 12H), 3.72-3.58 (m, 25H), 3.56-3.47 (m, 36H), 3.31 (bs, 22H), 3.13-3.00 (m, 9H), 2.72-2.58 (m, 2H), 2.48-2.38 (m, 7H), 1.99-1.86 (m, 3H), 1.85-1.71 (m, 5H), 1.62 (bs, 17H), 1.55-1.44 (m, 5H), 1.42-1.14 (m, 18H), 1.14-0.97 (m, 13H), 0.95 (s, 4H), 0.89 (d, *J* = 6.3 Hz, 4H), 0.83 (dd, *J* = 6.6, 1.6 Hz, 7H), 0.64 (s, 3H).

## NMR Spectra

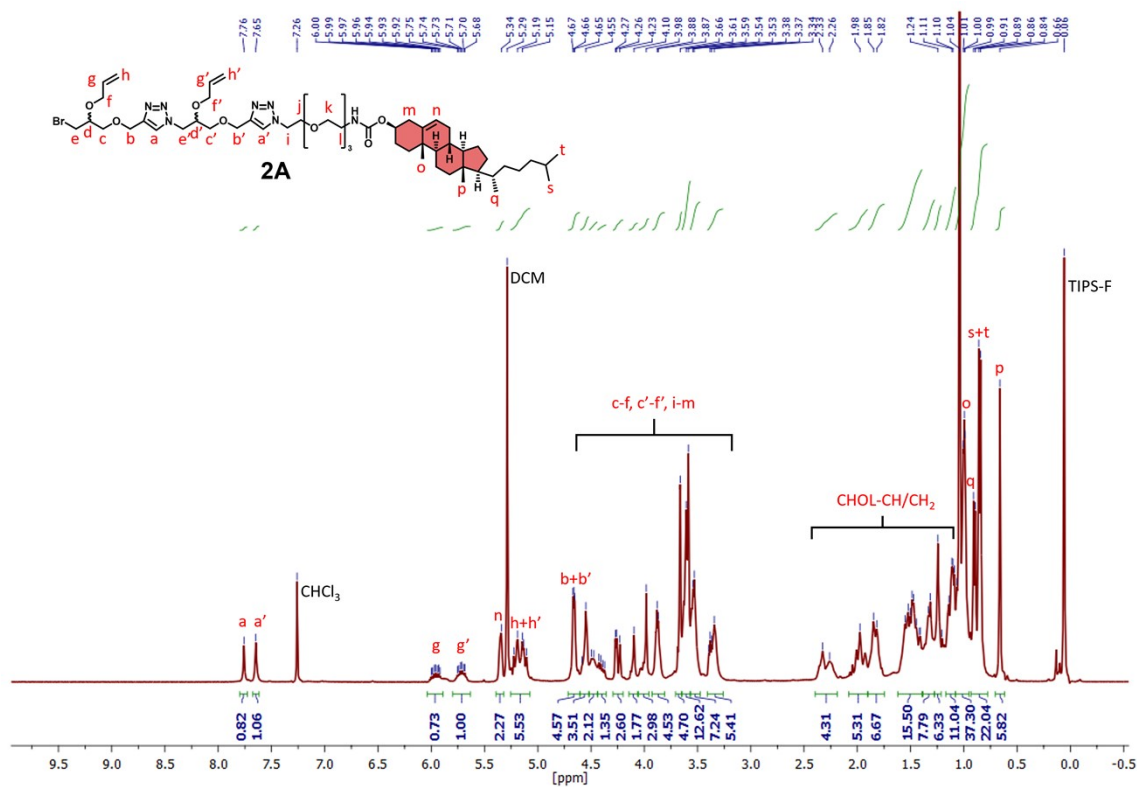

**Figure S1.** Assigned  $^1\text{H}$  NMR spectrum (400 MHz,  $\text{CDCl}_3$ ) of **2A**.

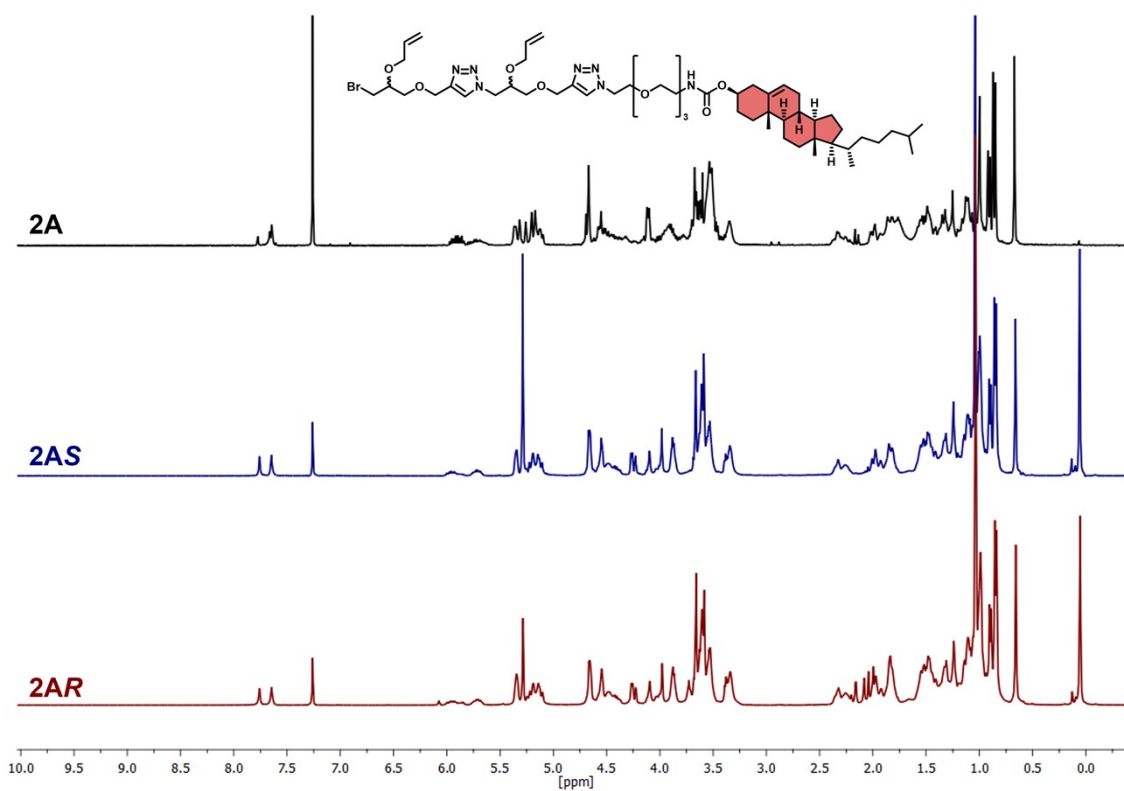

**Figure S2.** Stacked  $^1\text{H}$  NMR spectra (400 MHz,  $\text{CDCl}_3$ ) of **2A**, **2AS** and **2AR**.

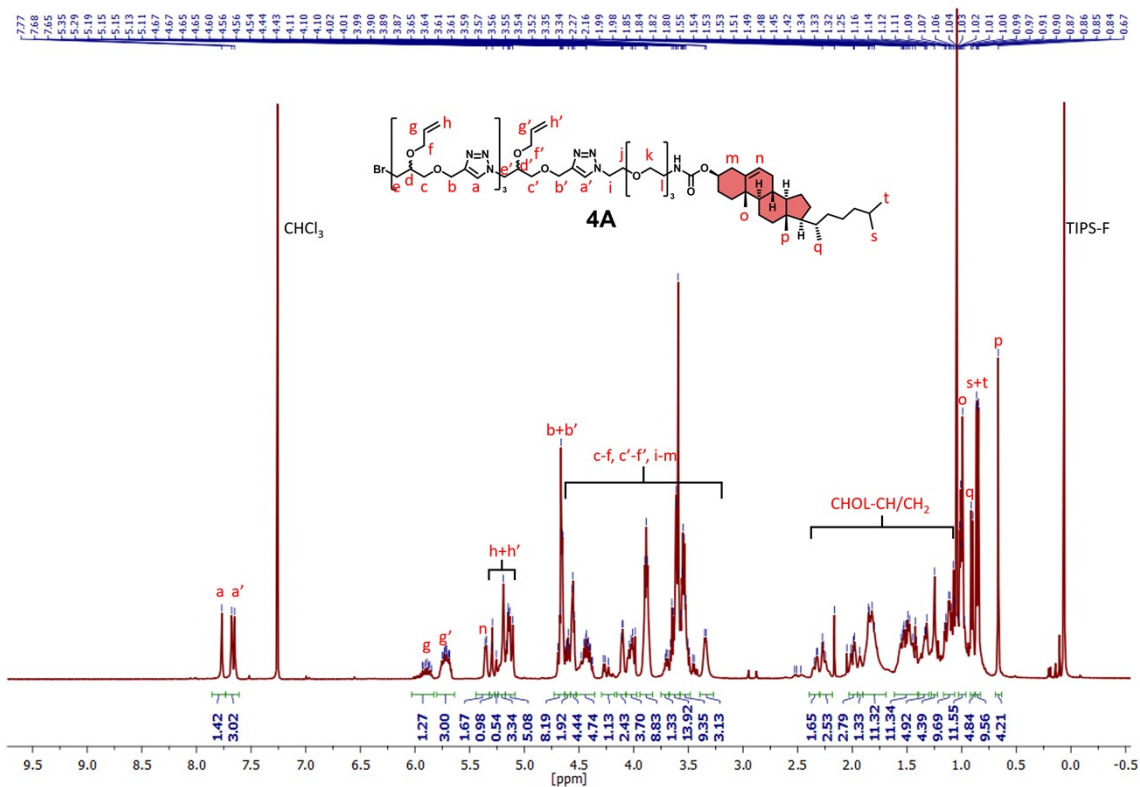

Figure S3. Assigned  $^1\text{H}$  NMR spectrum (400 MHz,  $\text{CDCl}_3$ ) of **4A**.

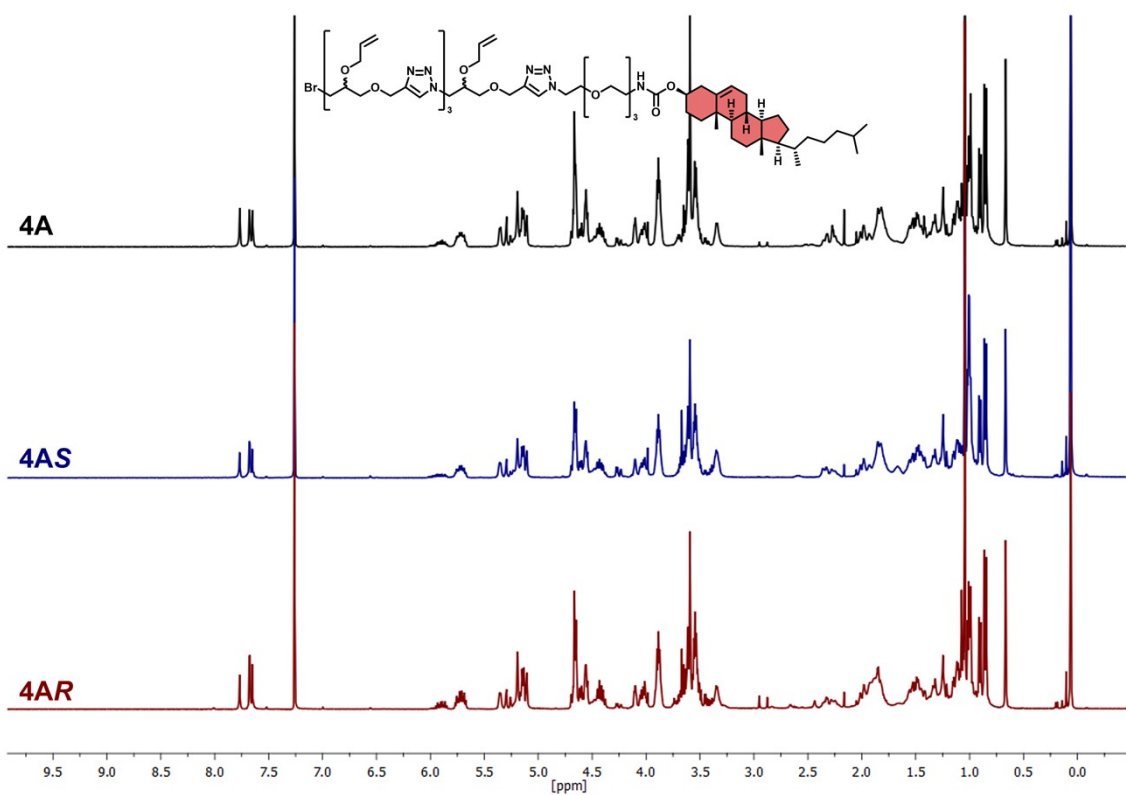

Figure S4. Stacked  $^1\text{H}$  NMR spectra (400 MHz,  $\text{CDCl}_3$ ) of **4A**, **4AS** and **4AR**.

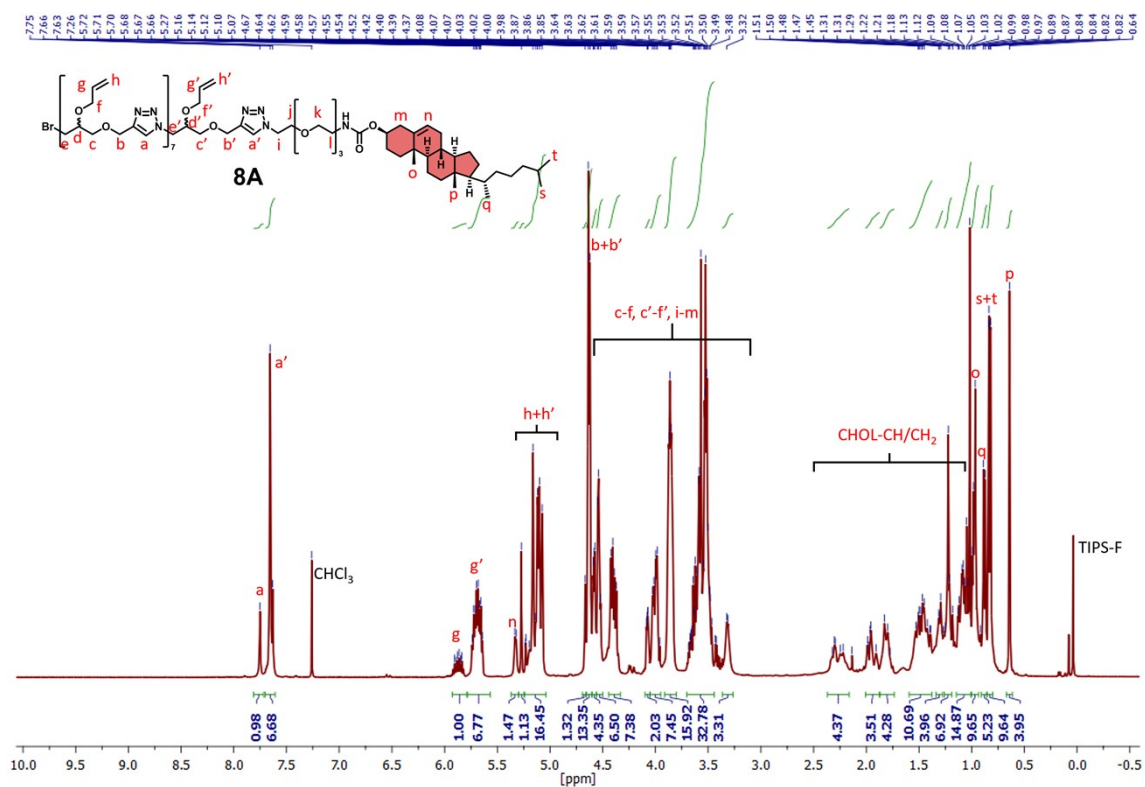

Figure S5. Assigned  $^1\text{H}$  NMR spectrum (400 MHz,  $\text{CDCl}_3$ ) of **8A**.

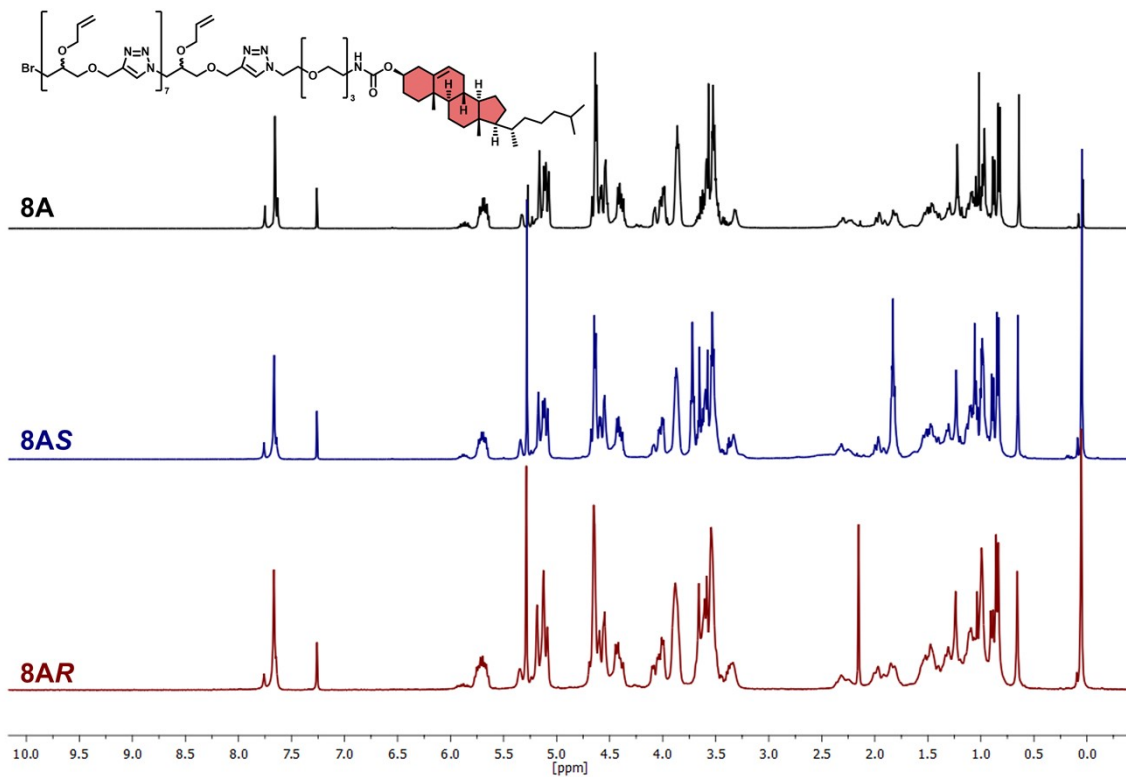

Figure S6. Stacked  $^1\text{H}$  NMR spectra (400 MHz,  $\text{CDCl}_3$ ) of **8A**, **8AS** and **8AR**.

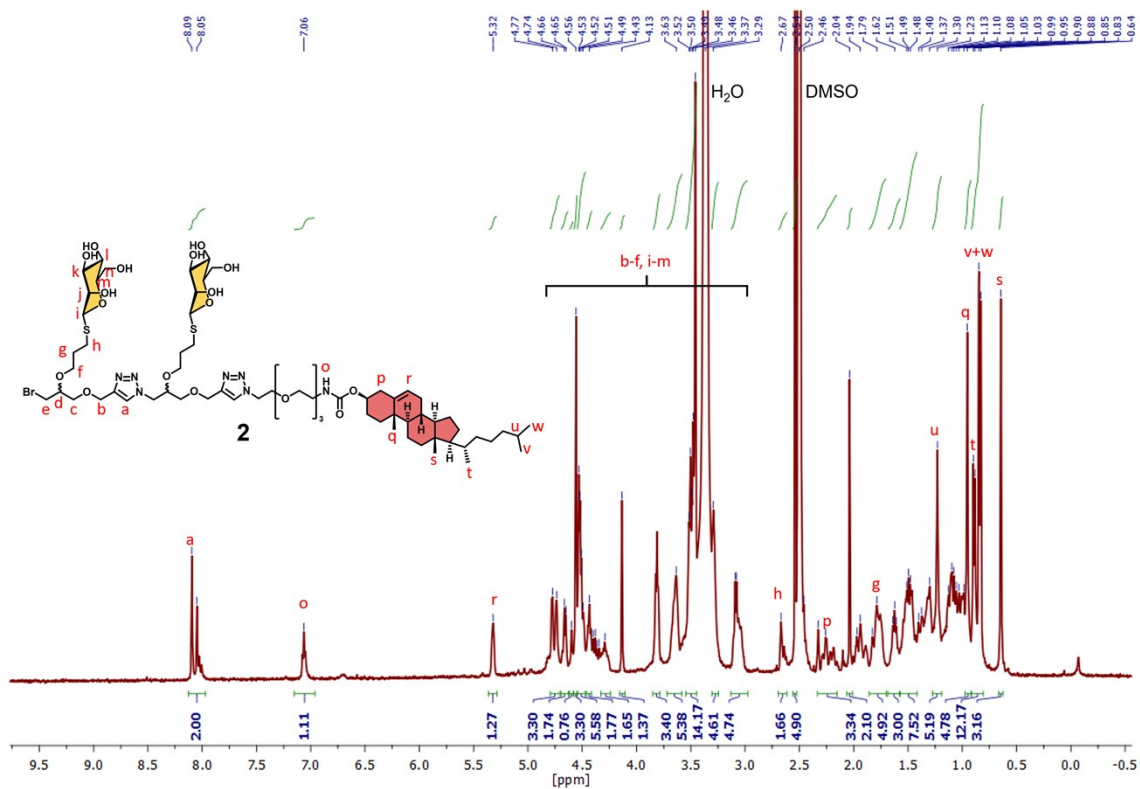

**Figure S7.** Assigned  $^1\text{H}$  NMR spectrum (400 MHz,  $\text{DMSO-}d_6$ ) of **2**.

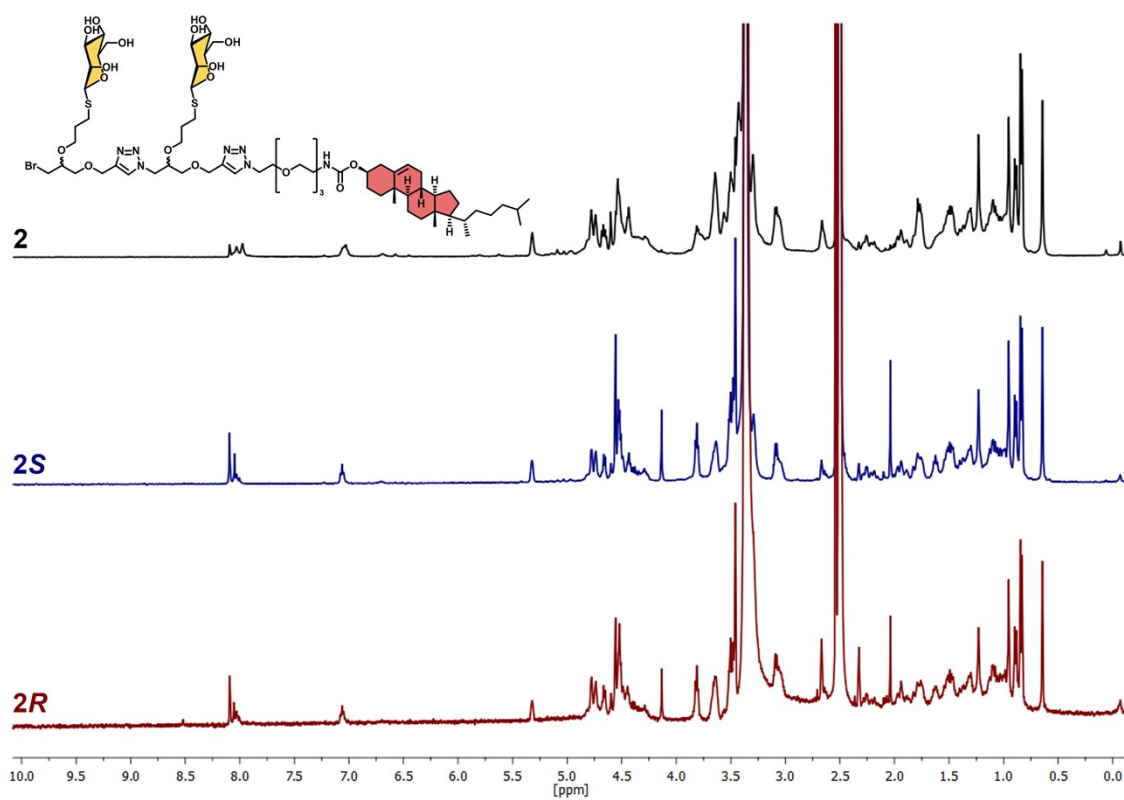

**Figure S8.** Stacked  $^1\text{H}$  NMR spectra (400 MHz,  $\text{DMSO-}d_6$ ) of **2**, **2S** and **2R**.

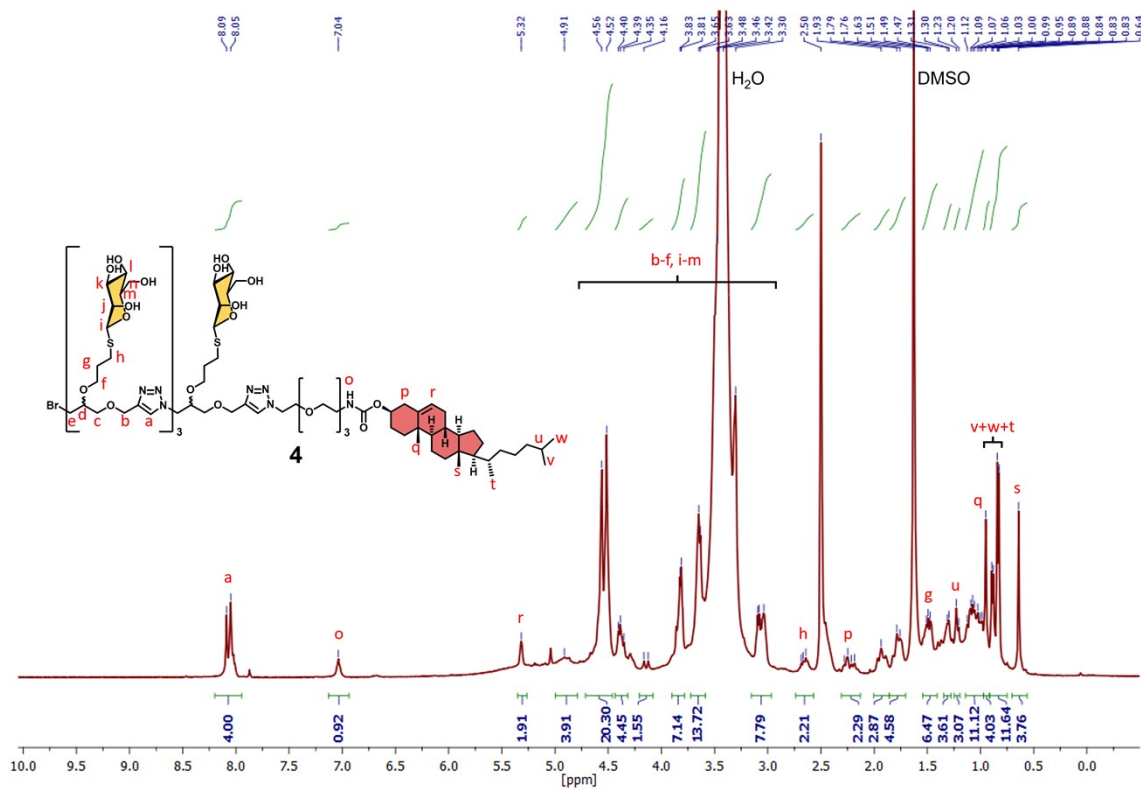

Figure S9. Assigned  $^1\text{H}$  NMR spectrum (400 MHz,  $\text{DMSO-}d_6$ ) of **4**.

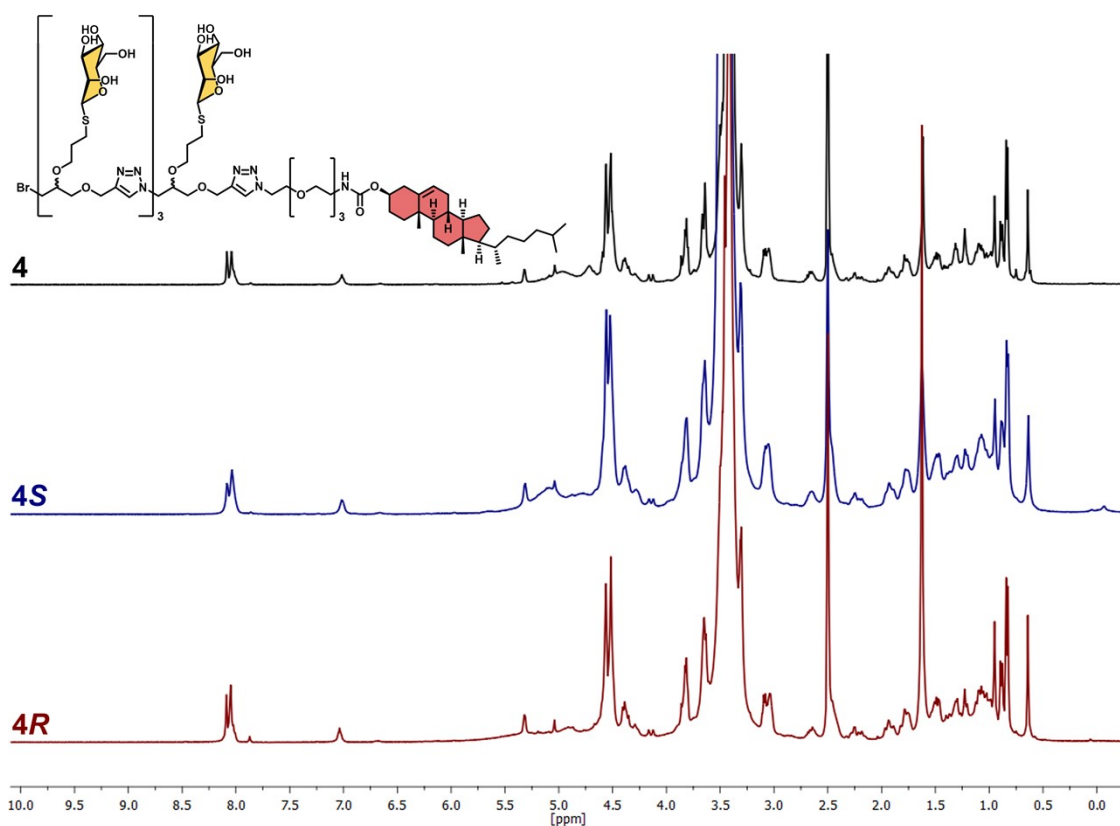

Figure S10. Stacked  $^1\text{H}$  NMR spectra (400 MHz,  $\text{DMSO-}d_6$ ) of **4**, **4S** and **4R**.

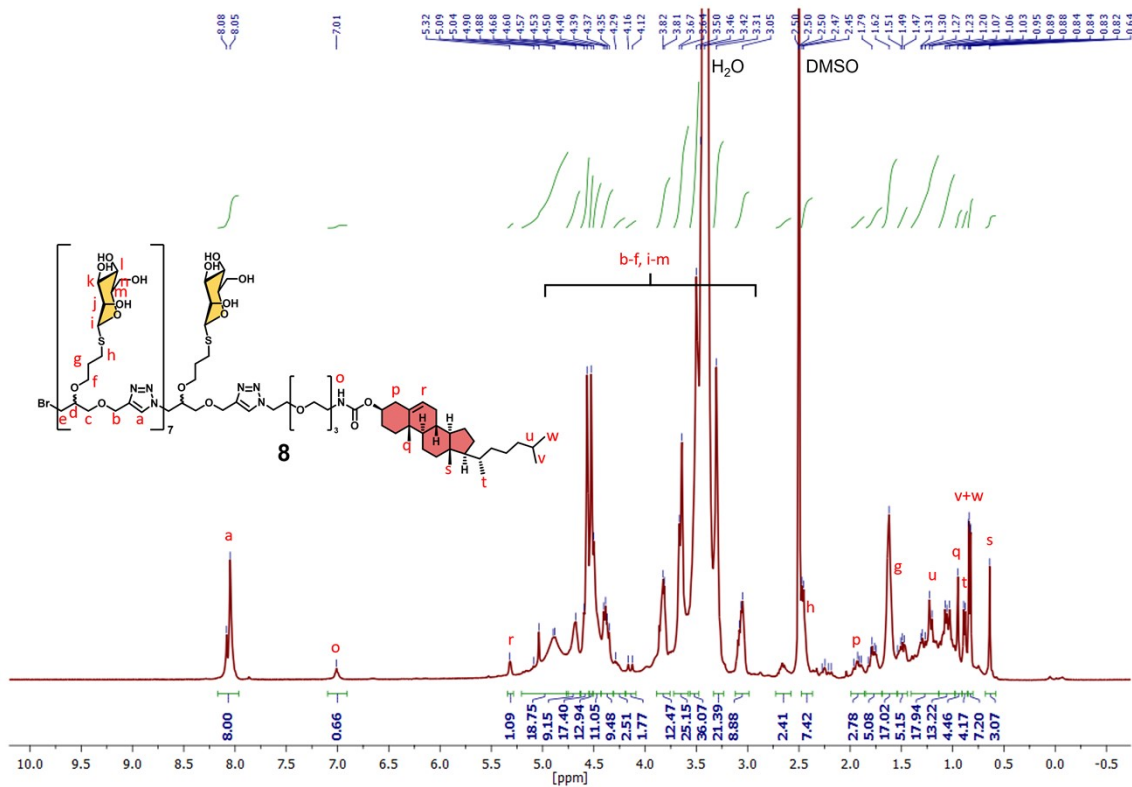

Figure S11. Assigned  $^1\text{H}$  NMR spectrum (400 MHz,  $\text{DMSO-}d_6$ ) of **8**.

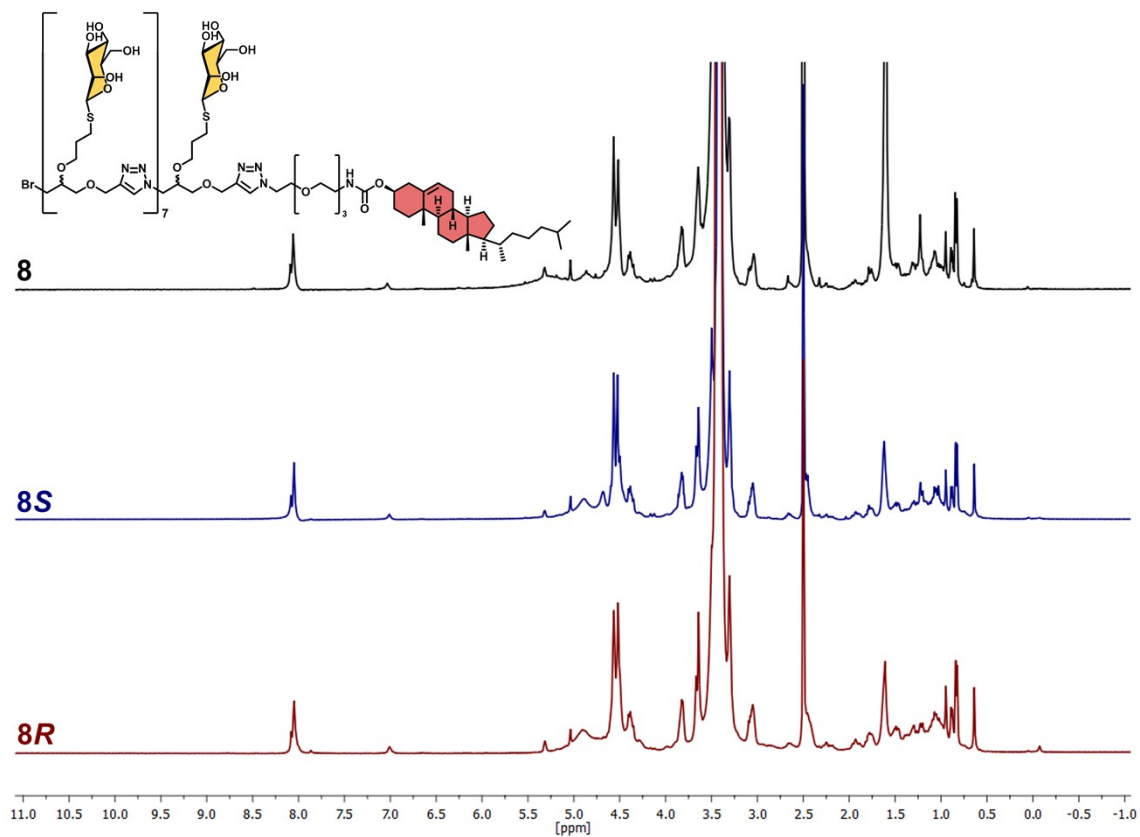

Figure S12. Stacked  $^1\text{H}$  NMR spectra (400 MHz,  $\text{DMSO-}d_6$ ) of **8**, **8S** and **8R**.

## ESI-MS of Chol-Glyco-IEGmers

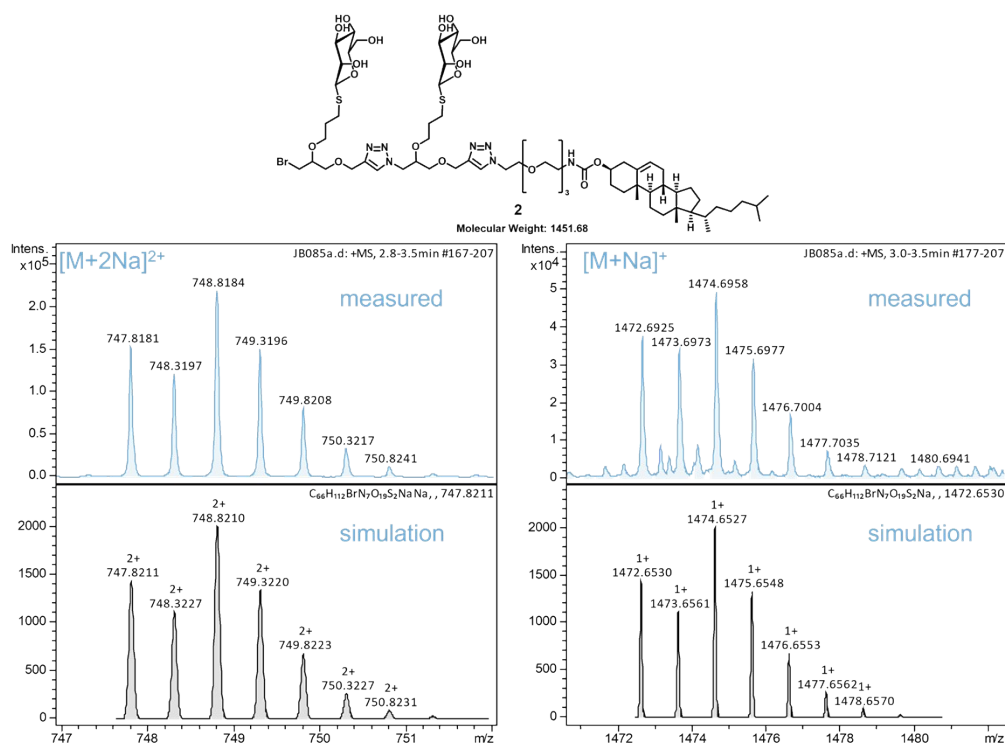

**Figure S13.** Overlay of HR ESI-MS spectra of **2** (top) with the peak prediction (bottom) of molecular ion peaks  $[M+Na]^+$  and  $[M+2Na]^{2+}$ .

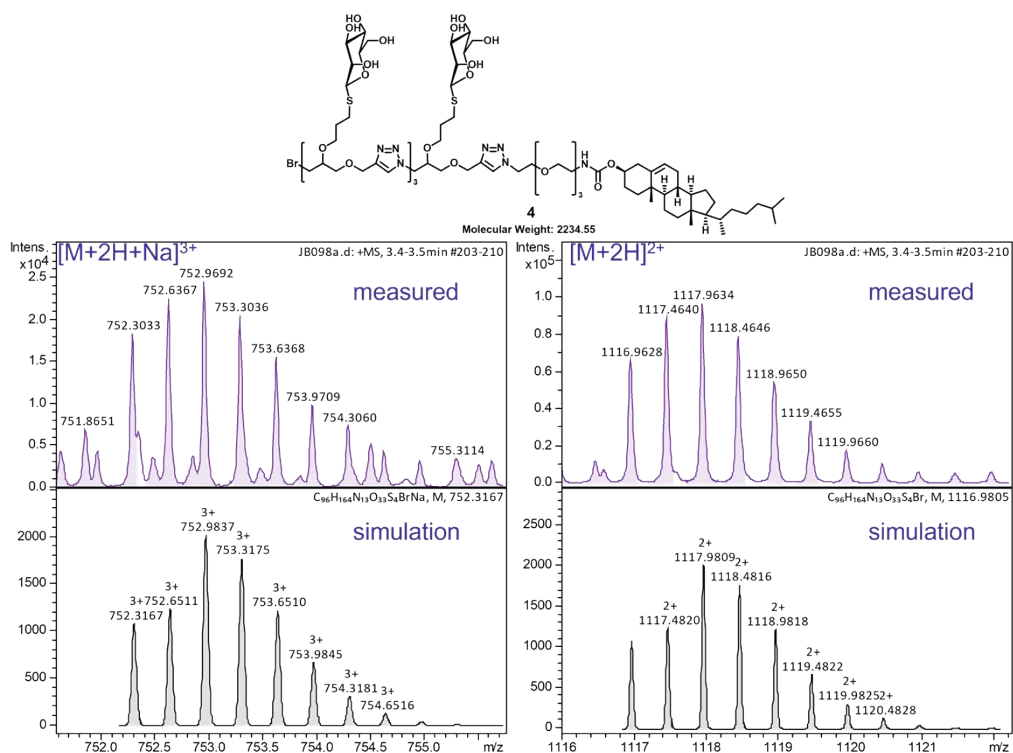

**Figure S14.** Overlay of HR ESI-MS spectra of **4** (top) with the peak prediction (bottom) of molecular ion peaks  $[M+2H]^{2+}$  and  $[M+2H+Na]^{3+}$ .

# SPR Binding Curves of Glyco-Chol-IEGmers

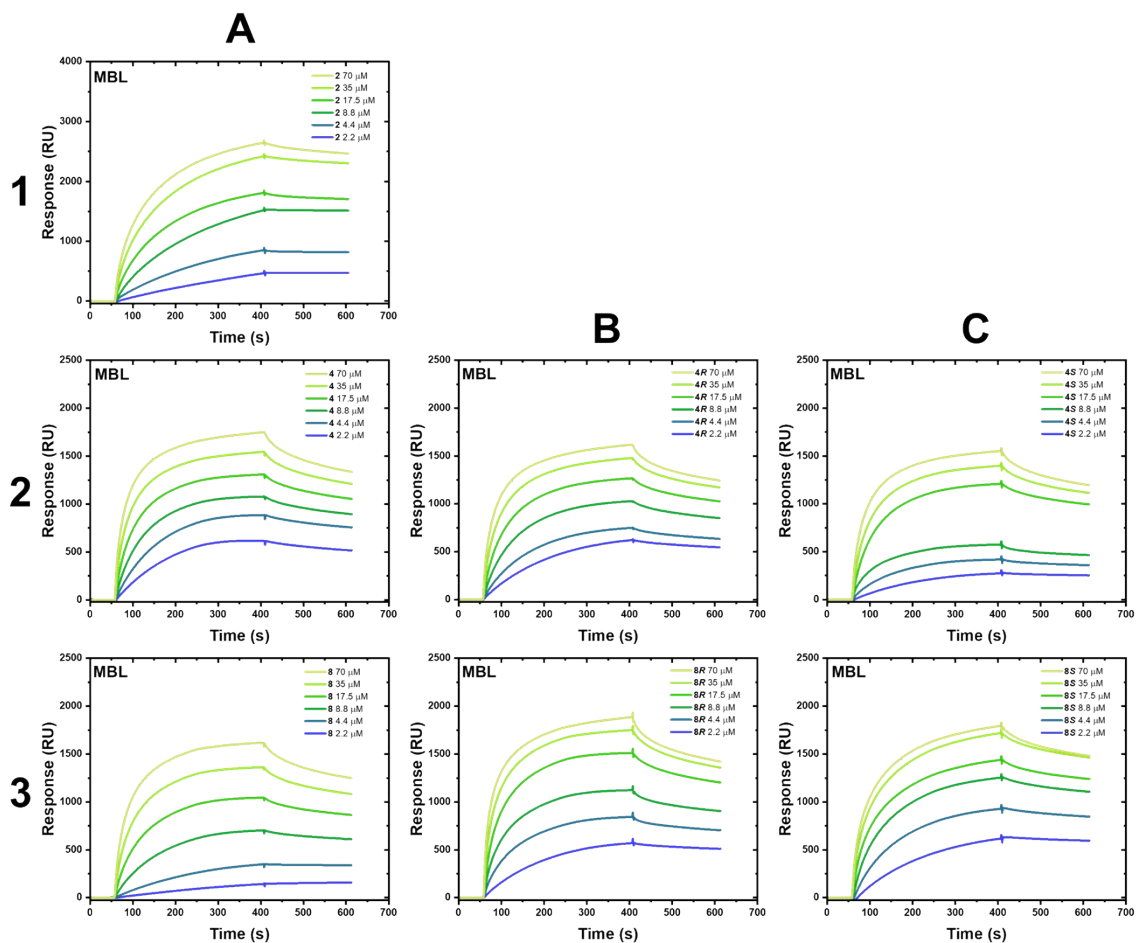

**Figure S15.** SPR binding curves of immobilised MBL with glycomacromolecules in varying concentrations from 2.2  $\mu\text{M}$  to 70  $\mu\text{M}$  in HBS. 1A: 2, 2A: 4, 2B: 4R, 2C: 4S, 3A: 8, 3B: 8R, 3C: 8S.

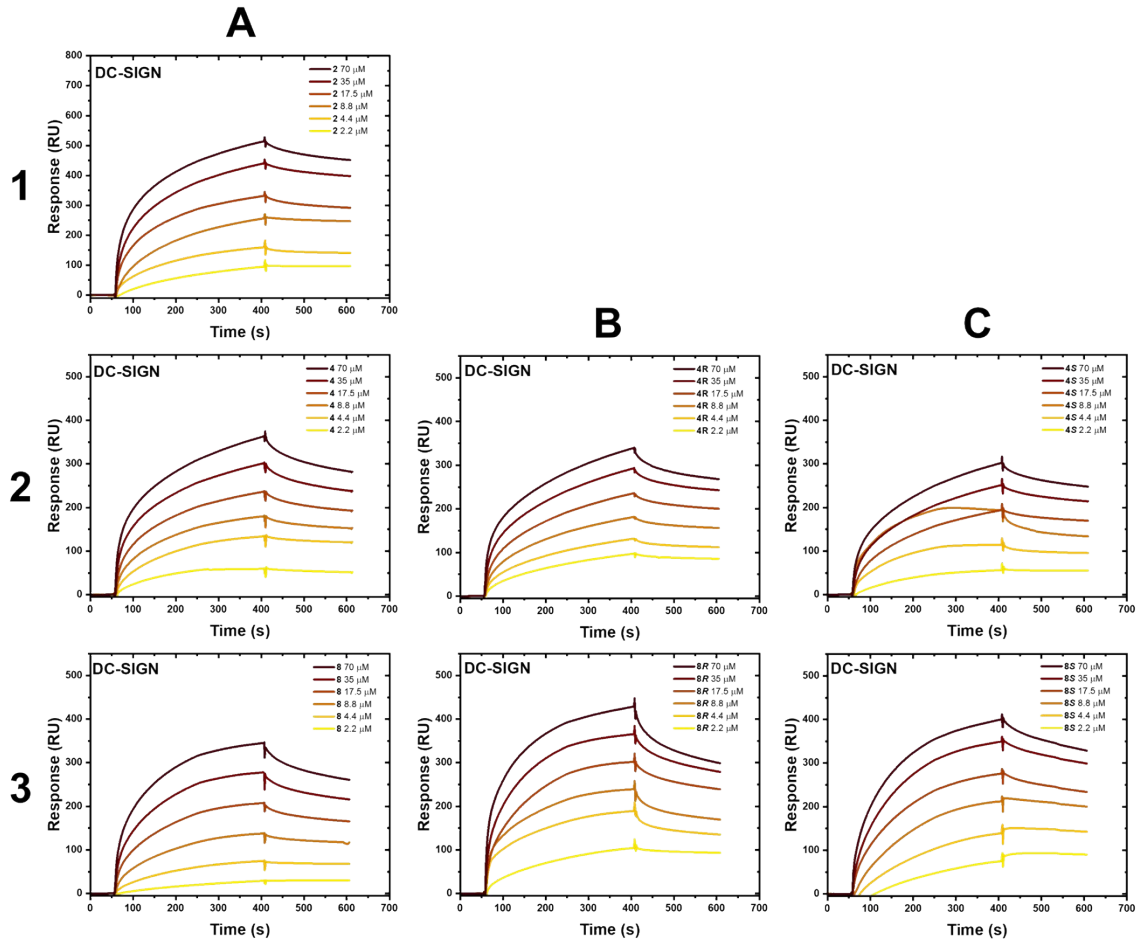

**Figure S16.** SPR binding curves of immobilised DC-SIGN with glycomacromolecules in varying concentrations from 2.2  $\mu\text{M}$  to 70  $\mu\text{M}$  in HBS. **1A: 2, 2A: 4, 2B: 4R, 2C: 4S, 3A: 8, 3B: 8R, 3C: 8S.**

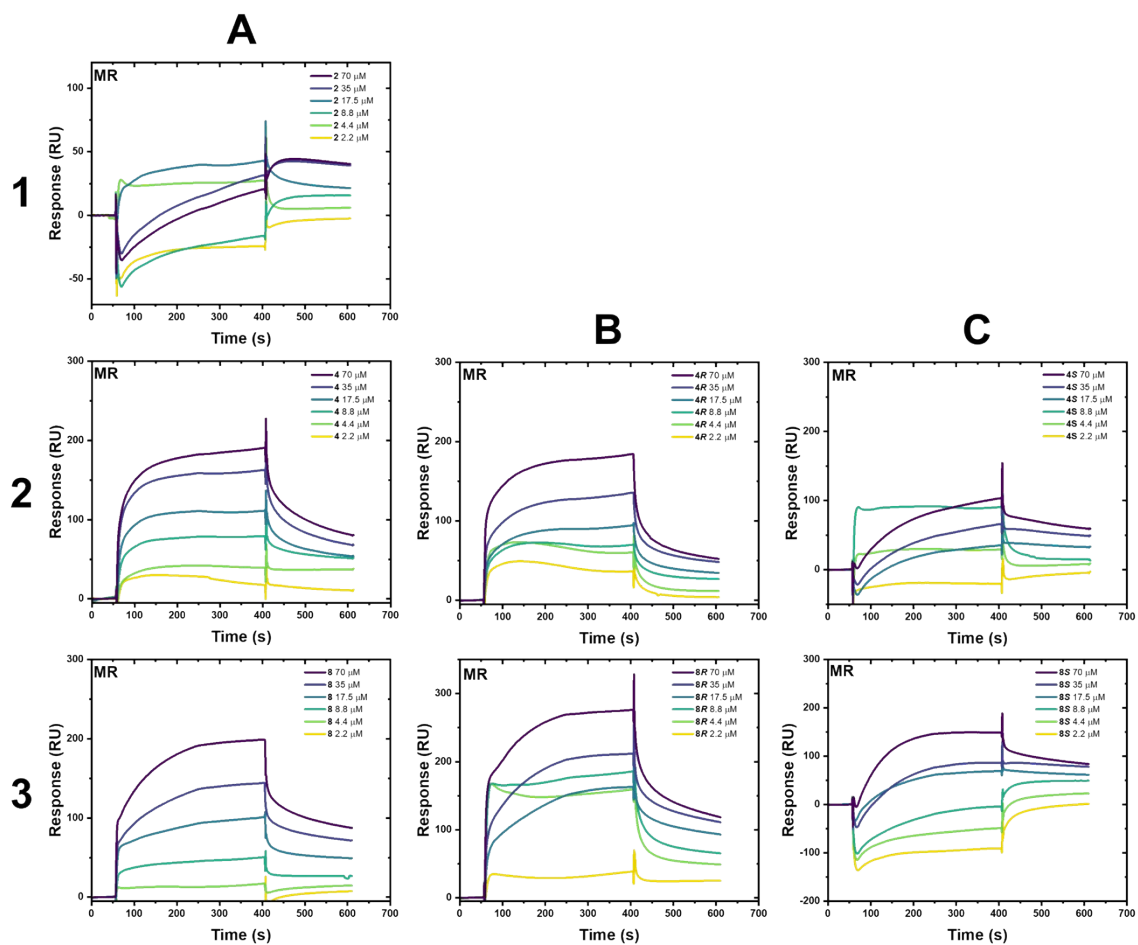

**Figure S17.** SPR binding curves of immobilised MR with glycomacromolecules in varying concentrations from 2.2  $\mu\text{M}$  to 70  $\mu\text{M}$  in HBS. 1A: 2, 2A: 4, 2B: 4R, 2C: 4S, 3A: 8, 3B: 8R, 3C: 8S.

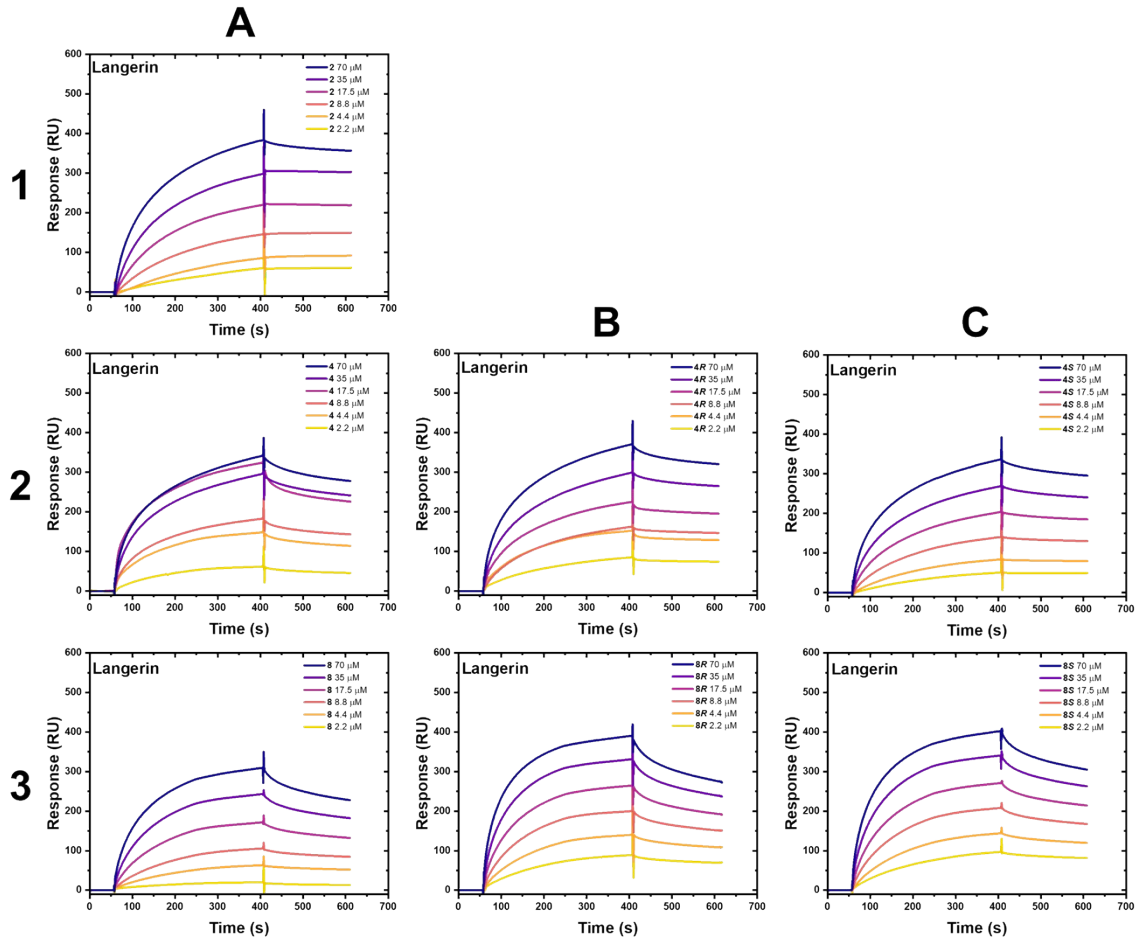

**Figure S18.** SPR binding curves of immobilised Langerin with glycomacromolecules in varying concentrations from 2.2  $\mu\text{M}$  to 70  $\mu\text{M}$  in HBS. 1A: 2, 2A: 4, 2B: 4R, 2C: 4S, 3A: 8, 3B: 8R, 3C: 8S.

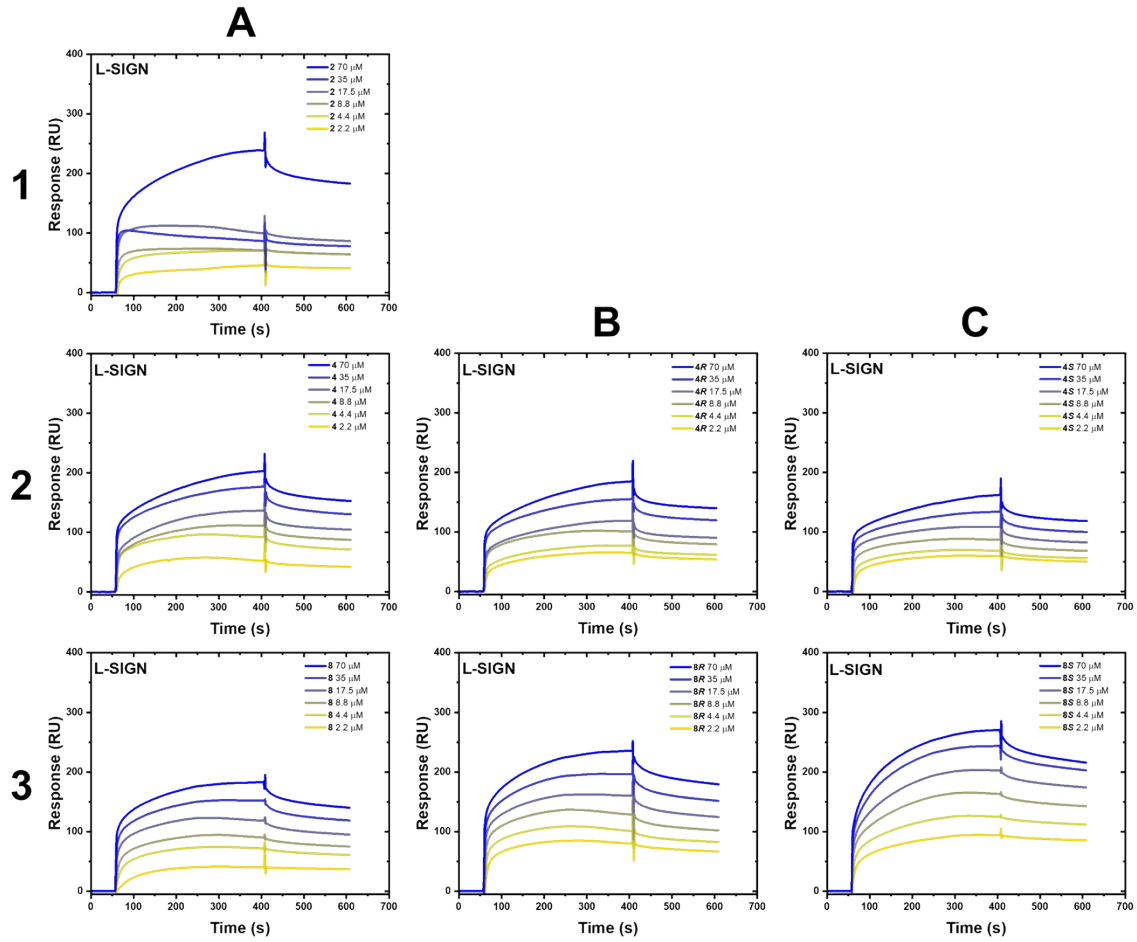

**Figure S19.** SPR binding curves of immobilised L-SIGN with glycomacromolecules in varying concentrations from 2.2  $\mu\text{M}$  to 70  $\mu\text{M}$  in HBS. 1A: 2, 2A: 4, 2B: 4R, 2C: 4S, 3A: 8, 3B: 8R, 3C: 8S.

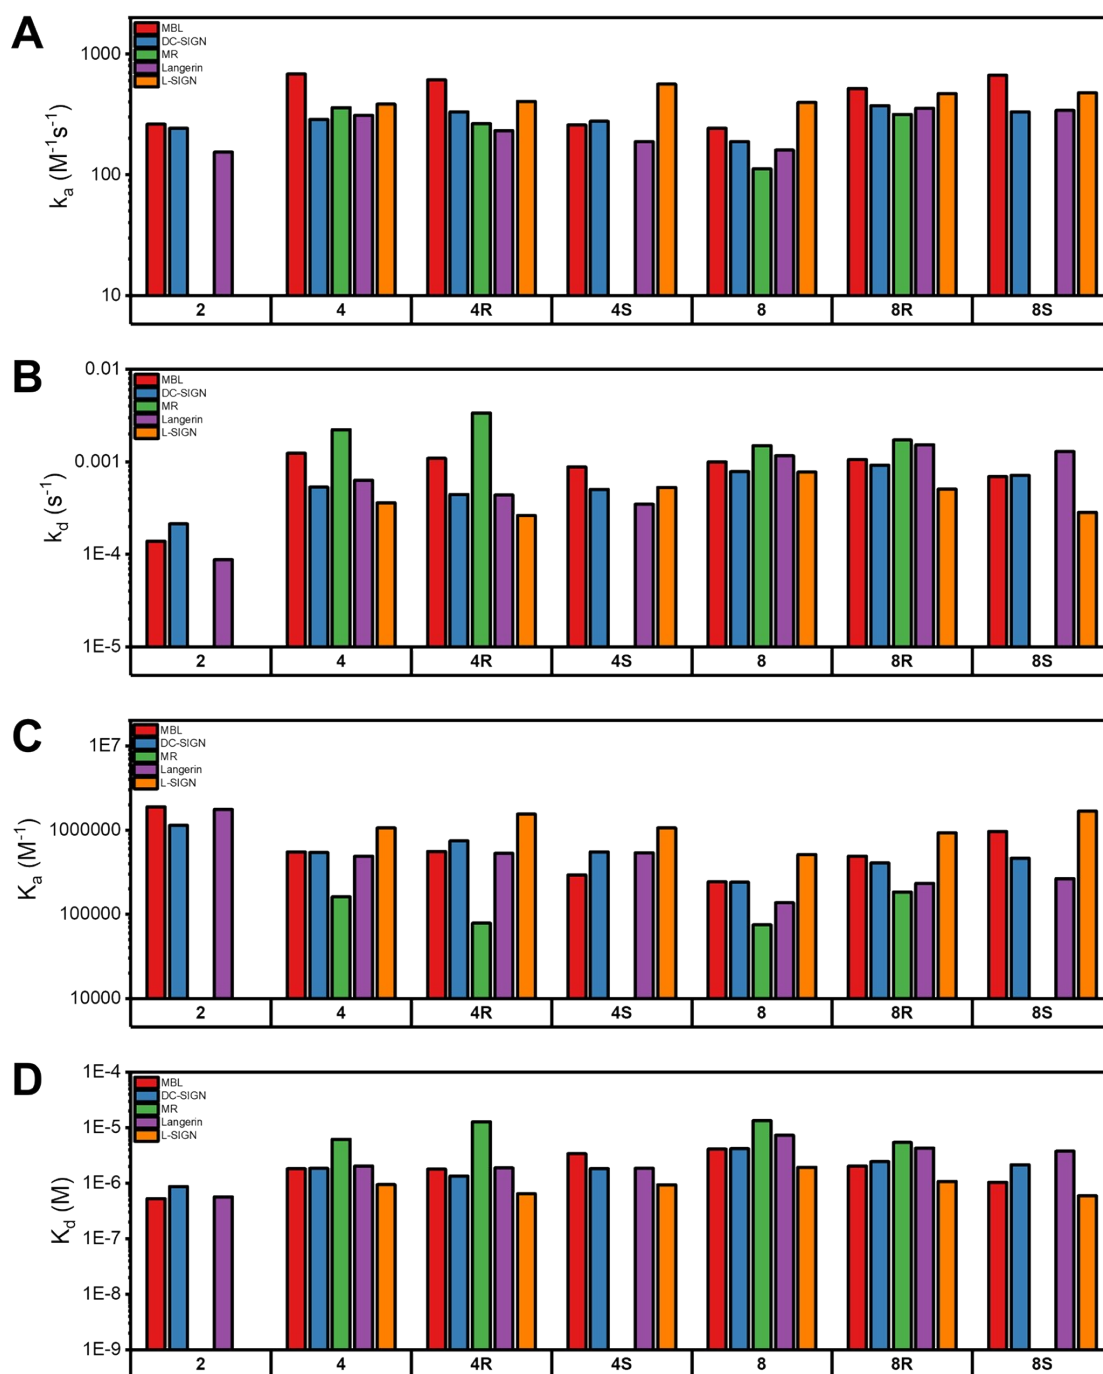

**Figure S20.** Bar plot of the kinetic data evaluated from SPR binding curves for cholesterol-containing glycomacromolecules and lectins using a Langmuir 1:1 binding model. **A:**  $k_a$ , **B:**  $k_d$ , **C:**  $K_a$ , **D:**  $K_d$ .

**Table S1.** Kinetic data of cholesterol-containing glycomacromolecules evaluated from SPR binding curves using a Langmuir 1:1 binding model.

| Sample    | Lectin   | $k_a$ [ $M^{-1}s^{-1}$ ] | $k_d$ [ $s^{-1}$ ]    | $R_{max}$ [RU] | $K_a$ [ $M^{-1}$ ] | $K_d$ [M]             |
|-----------|----------|--------------------------|-----------------------|----------------|--------------------|-----------------------|
| <b>2</b>  | MBL      | 262                      | $1.39 \times 10^{-4}$ | 2500           | $1.89 \times 10^6$ | $5.29 \times 10^{-7}$ |
|           | DC-SIGN  | 243                      | $2.13 \times 10^{-4}$ | 456            | $1.14 \times 10^6$ | $8.76 \times 10^{-7}$ |
|           | MR       | -                        | -                     | -              | -                  | -                     |
|           | Langerin | 154                      | $8.74 \times 10^{-5}$ | 372            | $1.76 \times 10^6$ | $5.68 \times 10^{-7}$ |
|           | L-SIGN   | -                        | -                     | -              | -                  | -                     |
| <b>4</b>  | MBL      | 683                      | $1.24 \times 10^{-3}$ | 1560           | $5.50 \times 10^5$ | $1.82 \times 10^{-6}$ |
|           | DC-SIGN  | 288                      | $5.32 \times 10^{-4}$ | 303            | $5.42 \times 10^5$ | $1.85 \times 10^{-6}$ |
|           | MR       | 360                      | $2.23 \times 10^{-3}$ | 127            | $1.61 \times 10^5$ | $6.20 \times 10^{-6}$ |
|           | Langerin | 311                      | $6.33 \times 10^{-4}$ | 313            | $4.90 \times 10^5$ | $2.04 \times 10^{-6}$ |
|           | L-SIGN   | 384                      | $3.61 \times 10^{-4}$ | 148            | $1.06 \times 10^6$ | $9.41 \times 10^{-7}$ |
| <b>4R</b> | MBL      | 611                      | $1.09 \times 10^{-3}$ | 1470           | $5.58 \times 10^5$ | $1.79 \times 10^{-6}$ |
|           | DC-SIGN  | 332                      | $4.45 \times 10^{-4}$ | 285            | $7.46 \times 10^5$ | $1.34 \times 10^{-6}$ |
|           | MR       | 265                      | $3.38 \times 10^{-3}$ | 109            | $7.83 \times 10^4$ | $1.28 \times 10^{-5}$ |
|           | Langerin | 232                      | $4.38 \times 10^{-4}$ | 332            | $5.29 \times 10^5$ | $1.89 \times 10^{-6}$ |
|           | L-SIGN   | 406                      | $2.63 \times 10^{-4}$ | 128            | $1.55 \times 10^6$ | $6.47 \times 10^{-7}$ |
| <b>4S</b> | MBL      | 258                      | $8.81 \times 10^{-4}$ | 1460           | $2.93 \times 10^5$ | $3.41 \times 10^{-6}$ |
|           | DC-SIGN  | 277                      | $5.04 \times 10^{-4}$ | 267            | $5.50 \times 10^5$ | $1.82 \times 10^{-6}$ |
|           | MR       | -                        | -                     | -              | -                  | -                     |
|           | Langerin | 188                      | $3.48 \times 10^{-4}$ | 313            | $5.38 \times 10^5$ | $1.86 \times 10^{-6}$ |
|           | L-SIGN   | 563                      | $5.30 \times 10^{-4}$ | 110            | $1.06 \times 10^6$ | $9.40 \times 10^{-7}$ |
| <b>8</b>  | MBL      | 243                      | $9.97 \times 10^{-4}$ | 1500           | $2.43 \times 10^5$ | $4.11 \times 10^{-6}$ |
|           | DC-SIGN  | 188                      | $7.83 \times 10^{-4}$ | 314            | $2.40 \times 10^5$ | $4.17 \times 10^{-6}$ |
|           | MR       | 112                      | $1.50 \times 10^{-3}$ | 146            | $7.48 \times 10^4$ | $1.34 \times 10^{-5}$ |
|           | Langerin | 160                      | $1.16 \times 10^{-3}$ | 307            | $1.37 \times 10^5$ | $7.28 \times 10^{-6}$ |
|           | L-SIGN   | 397                      | $7.74 \times 10^{-4}$ | 140            | $5.13 \times 10^5$ | $1.95 \times 10^{-6}$ |
| <b>8R</b> | MBL      | 519                      | $1.06 \times 10^{-3}$ | 1690           | $4.91 \times 10^5$ | $2.04 \times 10^{-6}$ |
|           | DC-SIGN  | 375                      | $9.20 \times 10^{-4}$ | 359            | $4.08 \times 10^5$ | $2.45 \times 10^{-6}$ |
|           | MR       | 317                      | $1.72 \times 10^{-3}$ | 181            | $1.84 \times 10^5$ | $5.42 \times 10^{-6}$ |
|           | Langerin | 356                      | $1.53 \times 10^{-3}$ | 355            | $2.33 \times 10^5$ | $4.30 \times 10^{-6}$ |
|           | L-SIGN   | 470                      | $5.06 \times 10^{-4}$ | 172            | $9.28 \times 10^5$ | $1.08 \times 10^{-6}$ |
| <b>8S</b> | MBL      | 667                      | $6.92 \times 10^{-4}$ | 1650           | $9.64 \times 10^5$ | $1.04 \times 10^{-6}$ |
|           | DC-SIGN  | 332                      | $7.16 \times 10^{-4}$ | 375            | $4.64 \times 10^5$ | $2.16 \times 10^{-6}$ |
|           | MR       | -                        | -                     | -              | -                  | -                     |
|           | Langerin | 341                      | $1.29 \times 10^{-3}$ | 371            | $2.65 \times 10^5$ | $3.78 \times 10^{-6}$ |
|           | L-SIGN   | 477                      | $2.84 \times 10^{-4}$ | 217            | $1.68 \times 10^6$ | $5.95 \times 10^{-7}$ |

## Physicochemical Characterisation of LNP formulations

**Table S2.** Overview over formulation composition and physicochemical characterisation results of LNPs used for transfection assay with HEK and THP-1 cell lines.

| Sample           | Ionisable Lipid | Helper Lipid | Hydrodynamic Diameter [nm]* | s.d. | PDI  | s.d. | Zeta potential [mV] | s.d. | saRNA Loading Efficiency [%]** |
|------------------|-----------------|--------------|-----------------------------|------|------|------|---------------------|------|--------------------------------|
| C12 DSPC Control | C12-200         | DSPC         | 75.01                       | 1.40 | 0.22 | 0.00 | -9.15               | 1.37 | 97.9                           |
| C12+ <b>2</b>    | C12-200         | DSPC         | 112.40                      | 1.50 | 0.38 | 0.01 | -7.29               | 0.68 | 96.6                           |
| C12+ <b>2S</b>   | C12-200         | DSPC         | 93.17                       | 1.95 | 0.20 | 0.01 | -8.08               | 0.98 | 97.7                           |
| C12+ <b>2R</b>   | C12-200         | DSPC         | 76.84                       | 2.40 | 0.21 | 0.02 | -8.41               | 1.31 | 98.1                           |
| C12+ <b>4</b>    | C12-200         | DSPC         | 93.82                       | 1.68 | 0.23 | 0.02 | -9.54               | 0.66 | 94.8                           |
| C12+ <b>4S</b>   | C12-200         | DSPC         | 82.71                       | 2.24 | 0.22 | 0.03 | -8.40               | 1.58 | 97.8                           |
| C12+ <b>4R</b>   | C12-200         | DSPC         | 83.83                       | 2.15 | 0.25 | 0.01 | -9.55               | 0.33 | 96.5                           |
| C12+ <b>8</b>    | C12-200         | DSPC         | 81.50                       | 1.23 | 0.21 | 0.01 | -9.02               | 0.53 | 97.5                           |
| C12+ <b>8S</b>   | C12-200         | DSPC         | 99.57                       | 0.65 | 0.18 | 0.01 | -9.20               | 1.09 | 96.6                           |
| C12+ <b>8R</b>   | C12-200         | DSPC         | 85.01                       | 1.48 | 0.23 | 0.00 | -14.40              | 1.39 | 97.1                           |

\*from DLS, intensity weighted \*\* from RiboGreen assay

**Table S3.** Overview over formulation composition and physicochemical characterisation results of LNPs used for transfection assay with HEK 293T/17 cell line and BMDCs.

| Sample           | Ionisable Lipid | Helper Lipid | Hydrodynamic Diameter [nm]* | s.d.  | PDI  | s.d. | Zeta potential [mV] | s.d. | saRNA Loading Efficiency [%]** |
|------------------|-----------------|--------------|-----------------------------|-------|------|------|---------------------|------|--------------------------------|
| C12 DSPC Control | C12-200         | DSPC         | 78.50                       | 8.60  | 0.30 | 0.04 | -5.09               | 0.84 | 97.0                           |
| C12+ <b>4</b>    | C12-200         | DSPC         | 86.97                       | 3.08  | 0.40 | 0.02 | -4.13               | 0.41 | 97.2                           |
| C12+ <b>8</b>    | C12-200         | DSPC         | 94.41                       | 40.41 | 0.30 | 0.06 | -8.60               | 1.72 | 98.2                           |
| C12+ <b>8S</b>   | C12-200         | DSPC         | 97.00                       | 3.77  | 0.41 | 0.02 | -5.17               | 1.07 | 97.7                           |
| C12+ <b>8R</b>   | C12-200         | DSPC         | 141.58                      | 2.81  | 0.40 | 0.08 | -7.39               | 1.04 | 97.6                           |

\*from DLS, intensity weighted \*\* from RiboGreen assay
